# Supplementary material for: Grey and white matter abnormalities in chronic obstructive pulmonary disease: a case–control study
Source: PubMed Central journal article supplement — BMJ Open. 2012 Apr 24;2(2):e000844. doi: 10.1136/bmjopen-2012-000844 (PMC3341600; doi:10.1136/bmjopen-2012-000844), 2012-04-24
Supplement: bmjopen-2012-000844.draft_revisions.pdf [file bmjopen-2012-000844.draft_revisions.pdf]

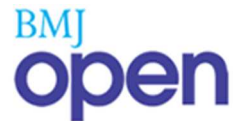

**Grey and white matter abnormalities in chronic obstructive pulmonary disease: a case-control study**

|                                 |                                                                                                                                                                                                                                                                                                                                                                                                                                                                                                                                                                                                                                                                                                                                                                                                                                                                                                                                                      |
|---------------------------------|------------------------------------------------------------------------------------------------------------------------------------------------------------------------------------------------------------------------------------------------------------------------------------------------------------------------------------------------------------------------------------------------------------------------------------------------------------------------------------------------------------------------------------------------------------------------------------------------------------------------------------------------------------------------------------------------------------------------------------------------------------------------------------------------------------------------------------------------------------------------------------------------------------------------------------------------------|
| Journal:                        | <i>BMJ Open</i>                                                                                                                                                                                                                                                                                                                                                                                                                                                                                                                                                                                                                                                                                                                                                                                                                                                                                                                                      |
| Manuscript ID:                  | bmjopen-2012-000844                                                                                                                                                                                                                                                                                                                                                                                                                                                                                                                                                                                                                                                                                                                                                                                                                                                                                                                                  |
| Article Type:                   | Research                                                                                                                                                                                                                                                                                                                                                                                                                                                                                                                                                                                                                                                                                                                                                                                                                                                                                                                                             |
| Date Submitted by the Author:   | 12-Jan-2012                                                                                                                                                                                                                                                                                                                                                                                                                                                                                                                                                                                                                                                                                                                                                                                                                                                                                                                                          |
| Complete List of Authors:       | Zhang, Jiaying; Department of Physiology and Neurobiology, Medical College of Xiamen University<br>zhang, haiyan; Department of Physiology and Neurobiology, Medical College of Xiamen University, Xiamen<br>wang, xiaochuan; Department of Neurology, the Affiliated Hospital of Hangzhou Normal University<br>lin, Jianzhong; Magnetic Resonance Center, Zhongshan Hospital, Medical College of Xiamen University<br>sun, Yinchuan; Department of Physiology and Neurobiology, Medical College of Xiamen University, Xiamen<br>huang, Yongxia; Department of Physiology and Neurobiology, Medical College of Xiamen University, Xiamen<br>yang, Tianhe; Magnetic Resonance Center, Zhongshan Hospital, Medical College of Xiamen University<br>zheng, Shili; Departments of Respiratory, Zhongshan Hospital, Medical College of Xiamen University<br>fan, ming; Department of Brain Protection and Plasticity, Institute of Basic Medical Sciences |
| <b>Primary Subject Heading</b>: | Radiology and imaging                                                                                                                                                                                                                                                                                                                                                                                                                                                                                                                                                                                                                                                                                                                                                                                                                                                                                                                                |
| Secondary Subject Heading:      | Neurology                                                                                                                                                                                                                                                                                                                                                                                                                                                                                                                                                                                                                                                                                                                                                                                                                                                                                                                                            |
| Keywords:                       | Adult intensive & critical care < INTENSIVE & CRITICAL CARE, Neuroradiology < NEUROLOGY, Magnetic resonance imaging < RADIOLOGY & IMAGING                                                                                                                                                                                                                                                                                                                                                                                                                                                                                                                                                                                                                                                                                                                                                                                                            |
|                                 |                                                                                                                                                                                                                                                                                                                                                                                                                                                                                                                                                                                                                                                                                                                                                                                                                                                                                                                                                      |

SCHOLARONE™  
Manuscripts

# Grey and white matter abnormalities in chronic obstructive pulmonary disease: a case-control study

Haiyan Zhang<sup>1#</sup>, Xiaochuan Wang<sup>2#</sup>, Jianzhong Lin<sup>3</sup>, Yinchuan Sun<sup>1</sup>, Yongxia Huang<sup>1</sup>, Tianhe

Yang<sup>3</sup>, Shili Zheng<sup>4</sup>, Ming Fan<sup>5</sup>, Jiaxing Zhang<sup>\*1</sup>

1 Department of Physiology and Neurobiology, Medical College of Xiamen University, Xiamen 361005, China;

2 Department of Neurology, the Affiliated Hospital of Hangzhou Normal University, Hangzhou 310015, China;

3 Magnetic Resonance Center, Zhongshan Hospital, Medical College of Xiamen University, Xiamen 361004, China;

4 Departments of Respiratory, Zhongshan Hospital, Medical College of Xiamen University, 361004, Xiamen, China.

5 Department of Brain Protection and Plasticity, Institute of Basic Medical Sciences, Beijing 100850, China

#, authors with equal contributions

## Corresponding author:

Jiaxing Zhang, PhD

Department of Physiology and Neurobiology

Medical College of Xiamen University

Xiamen, 361005, China

Tel: +86-0592-2188-421

Email: zhangjiaxing@xmu.edu.cn

**Keywords:** Brain, chronic obstructive pulmonary disease, grey matter, magnetic resonance images,

white matter

**Word count:** 2989

**ABSTRACT**

Objectives The irreversible airflow limitation characterized chronic obstructive pulmonary disease (COPD) causes a decrease in oxygen supply to brain. The present study was to investigate brain structural damage in COPD. Design Retrospective case-control study. Stable COPD patients and healthy volunteers were recruited. The two groups were matched in age, sex, and educational background. Setting A hospital and a number of communities: they are all located in southern Fujian province, China. Participants 25 patients and controls were collected from December 2009 to May 2011. Primary and secondary outcome measures Using voxel-based morphometry and tract-based spatial statistics based on MR images to analyze grey matter density and white matter fractional anisotropy (FA), respectively, and a battery of neuropsychological tests were performed. Results COPD patients (vs. controls) showed decreased grey matter density in the limbic and paralimbic structures, including right gyrus rectus, left precentral gyrus, bilateral anterior and middle cingulate gyri, bilateral superior temporal gyri, bilateral anterior insula extending to Rolandic operculum, bilateral thalamus/pulvinars, and left caudate nucleus. COPD patients (vs. controls) had decreased FA values in the bilateral superior corona radiata, bilateral superior and inferior longitudinal fasciculus, bilateral optic radiation, bilateral lingual gyri, left parahippocampal gyrus, and fornix. Lower FA values in these regions were associated with increased radial diffusivity and no changes of longitudinal diffusivity. COPD patients had poor performances in the Mini Mental State Examination, figure memory, and visual reproduction. GM density in some of the above regions in COPD had positive correlations with arterial blood  $Po_2$  while negative correlations with disease duration, and also, had positive correlations with visual tasks. Conclusion We demonstrated that COPD exhibited loss of regional grey matter accompanied by impairment of white matter microstructural integrity, which was

1  
2  
3 associated with disease severity and may underlie the pathophysiological and psychological changes of  
4  
5  
6 COPD.  
7  
8  
9

10 **Funding:** This work was supported by National Science Foundation of China (Project No. 31071041;  
11  
12 81171324), Bureau of Science and Technology of Hangzhou (20090833B10), and Health Bureau of  
13  
14 Zhejiang Province (2009A168).  
15  
16

17 **Competing interests:** None.  
18

19 **Data Sharing:** We agree share our data with Dryad.  
20

21 **Contributorship:** Hanyang Zhang, Xiaochuan Wang, Jianzhong Lin  
22  
23  
24  
25  
26  
27  
28  
29  
30  
31  
32  
33  
34  
35  
36  
37  
38  
39  
40  
41  
42  
43  
44  
45  
46  
47  
48  
49  
50  
51  
52  
53  
54  
55  
56  
57  
58  
59  
60

## INTRODUCTION

Chronic obstructive pulmonary disease (COPD) continues to be a major cause of morbidity and mortality. It is increasingly recognized that COPD extends beyond the lung.<sup>1</sup> The irreversible airflow limitation characterized COPD usually develop arterial oxygen desaturation, which could subsequently result in a decrease in oxygen transport to the brain. As the central nervous system is highly oxidative, it inevitably suffers from hypoxic stress. Hypoxia during COPD has been previously proved to induce cerebral perfusion decline<sup>2</sup> and metabolic decreases.<sup>3-5</sup> Moreover, systematic inflammation<sup>1</sup> may also cause neuronal damage in the brain of COPD patients. In fact, in COPD patients, clinical symptoms such as neuropsychological deficits,<sup>6</sup> depression and anxiety,<sup>1</sup> and physical disability<sup>1</sup> have been well documented. Taken together, all these data suggest the presence of brain structural alteration. However, until now, it remains to be largely uninvestigated.

Voxel-based morphometry (VBM) and Tract-Based Spatial Statistics (TBSS)<sup>7</sup> based on magnetic resonance images (MRI) were adopted to measure grey matter (GM) density and white matter (WM) fibrous microstructure properties in tracts, respectively. VBM is an automatic quantitative volumetric technique over the whole brain using voxel by voxel analysis without prior specification of regions of interest for analysis and it does not rely on arbitrarily predefined structures. Recently, the preprocessing steps of VBM have been improved with the Diffeomorphic Anatomical Registration Through Exponentiated Lie algebra (DARTEL) registration method,<sup>8</sup> which can achieve more accurate inter-subject registration of brain images. TBSS is a recently introduced method, which uses diffusion tensor MR imaging (DTI) to measure fractional anisotropy (FA). TBSS increases the sensitivity and the interpretability of the results compared with voxel-based approaches based purely on non-linear registration.<sup>7</sup> Moreover, diffusion tensor eigenvalues (longitudinal and radial diffusivities) were also

1  
2  
3  
4 included in the analysis since they can help interpret FA changes in WM tracts by providing  
5  
6 information regarding likely alterations in the proportion of longitudinally vs. obliquely aligned  
7  
8 myelinated fibers. The VBM and TBSS methods have been extensively applied in clinical researches,  
9  
10 including the evaluation of morphological characteristics of high-altitude residents in our previous  
11  
12 study.<sup>9</sup>

13  
14  
15  
16 Dyspnea is the most common complaint and most disabling symptom in patients with COPD.  
17  
18 Functional MRI studies on breathlessness, air hunger, and inspiratory loaded breathing have revealed  
19  
20 that a large number of brain regions, including the frontal cortex, parietal cortex, temporal cortex,  
21  
22 limbic cortex (insular cortex, cingulate cortex, thalamus, amygdala, hippocampus, and caudate nucleus),  
23  
24 cerebellar cortex, and brainstem, were activated by dyspnea.<sup>10</sup> These dyspnea-activated brain regions  
25  
26 have been shown to be impaired in patients with congenital central hypoventilation syndrome,<sup>11</sup> in  
27  
28 patients with obstructive sleep apnea patients,<sup>12</sup> and in high-altitude residents.<sup>9</sup> We therefore  
29  
30 hypothesized that COPD patients would have similar cerebral impairment.  
31  
32  
33  
34  
35  
36  
37  
38

## 39 **METHODS**

### 40 **Subjects**

41  
42 Twenty-five patients were collected from December 2009 to May 2011. All patients had undergone a  
43  
44 period 30 to 45 days of in-hospital rehabilitation following an acute exacerbation of COPD. At the time  
45  
46 of data collection, patients were in stable condition. Among these patients, 12 discharged patients were  
47  
48 recruited during their rest at home and 13 patients were recruited when they were awaiting discharge  
49  
50 from hospital. Patients were diagnosed in Zhongshan hospital (Xiamen, China) according to the  
51  
52 diagnostic criteria of Global Initiative for Chronic Obstructive Lung Disease (GOLD).<sup>13</sup> Twenty-five  
53  
54  
55  
56  
57  
58  
59  
60

1  
2  
3  
4 healthy volunteers, with comparable age, sex, and educational background, comprised the control  
5  
6 group. All the subjects were free from a known history of cerebrovascular accident, heart failure,  
7  
8 neurological disorders, OSA, or other diseases known to affect cognition. Patients were provided with  
9  
10 therapy including inhaled ipratropium bromide, bricanyl, ventoline, and budesonide. Demographic  
11  
12 characteristics of the patients and healthy volunteers were listed in Table 1. Procedures were fully  
13  
14 explained and all subjects were provided written informed consent before participating in the study.  
15  
16  
17  
18  
19 The experimental protocol was approved by the Research Ethics Review Board of Xiamen University.  
20  
21  
22  
23

#### 24 **Physiological and neuropsychological tests**

25  
26 Physiological and neuropsychological tests and activities of daily living (ADL) (score range 14-56)<sup>14</sup>  
27  
28 were conducted one day before MRI scan. The neuropsychological tests include: (i) the Chinese  
29  
30 version of the Mini Mental State Examination (MMSE) measured the general cognitive function. (ii)  
31  
32 the visual reproduction test, figure memory test, and digital span forward and backward tasks from the  
33  
34 Chinese revised version of Wechsler Memory Scale measured visual construction ability, visuospatial  
35  
36 memory, and short-term working memory, respectively. All data were analyzed using SPSS 19.0  
37  
38 (Chicago, IL, USA). Independent t test measures between-group differences.  
39  
40  
41  
42  
43  
44  
45  
46  
47

#### 48 **MRI data acquisition**

49  
50 Images were acquired on a Siemens Trio Tim 3.0T (Erlangen, Germany) at MRI Research Center  
51  
52 (Zhongshan Hospital, Xiamen, China). A 3D structural MRI was acquired from each subject using a  
53  
54 T1-weighted MPRAGE sequence (TR/TE = 1900 ms/2.48 ms, FOV = 25 × 25 cm<sup>2</sup>, NEX = 1, matrix =  
55  
56 512 × 256, slice thickness = 1.0 mm). Conventional 2D T1 and T2 images were also acquired and  
57  
58  
59  
60

1  
2  
3  
4 examined for any incidental findings. A DTI pulse sequence with single shot diffusion-weighted echo  
5  
6 planar imaging (TR/TE = 3600/95 ms, FOV=24 × 24 cm<sup>2</sup>, NEX = 2, matrix = 128 × 128, slice  
7  
8 thickness = 4.5 mm) was applied sequentially in 30 non-collinear directions (b-value = 1000s/mm<sup>2</sup>)  
9  
10 with one scan without diffusion weighting (b = 0s/mm<sup>2</sup>). The following data analyses were conducted  
11  
12  
13  
14 by two researchers who were blind to the status of subjects.  
15  
16  
17  
18

### 19 **VBM analysis of 3D T1 images**

20  
21 The 3D T1 images were used for GM analysis using VBM8 toolbox implemented in SPM8 (Wellcome  
22  
23 Department of Imaging Neuroscience, University College London, London, UK). The following  
24  
25 processing steps were carried out: (i) the images were inspected and set at the anterior commissure.  
26  
27  
28 Each reorientated image was segmented into GM, WM and CSF in native space and procrustes aligned  
29  
30 GM images were generated by a rigid transformation. (ii) the DARTEL was used to create  
31  
32 study-specific template by the aligned images from all the patients and controls to improve  
33  
34 inter-subject registration of structural images.<sup>8</sup> The procedure implicated in six iterations, which began  
35  
36 with the averaging of aligned data to generate an original template. Then, the first iteration of the  
37  
38 registration was done on each subject and a new template was created. After this, the second iteration  
39  
40 began. When six iterations were finished, the template was generated, which was the average of the  
41  
42 DARTEL registered data. During iterations, all images were warped to the template yielding a series of  
43  
44 flow fields that parameterized deformations. (iii) the normalized images were transformed into MNI  
45  
46 space. These GM images were then smoothed using a Gaussian kernel of 8 mm full-width at  
47  
48 half-maximum. Independent t-tests were performed to examine between-group differences. The  
49  
50 statistical parametric map was generated with threshold at  $t > 3.7734$ ,  $p < 0.01$  (FDR correction with  
51  
52  
53  
54  
55  
56  
57  
58  
59  
60



1  
2  
3  
4 sex, age, education, and total intracranial volume as covariates).

### 8 9 **TBSS analysis of DTI**

10  
11 DCM2MII was used to convert diffusion tensor images from the proprietary scanner format to the  
12  
13 NIFTI format. Then images were processed using FSL 4.1.5 software package  
14  
15 (<http://www.fmrib.ox.ac.uk/fsl/>). Images were realigned to the b-value (b0) image to remove eddy  
16  
17 current distortions and motion artifacts using FMRIB's diffusion toolbox (FDT).<sup>15</sup> Brain mask was  
18  
19 created from the first b0 image using Brain Extraction Tool (BET). After these processes images were  
20  
21 calculated with the FDT for FA, longitudinal diffusivity (principal diffusion direction,  $\lambda_1$ ) and radial  
22  
23 diffusivity (transverse diffusion component,  $[(\lambda_2+\lambda_3)/2]$ ) maps. The analysis of FA images was  
24  
25 performed using TBSS in FSL.<sup>7</sup> TBSS processing includes the following steps: (i) align the FA images  
26  
27 of all subjects to a template which was arbitrarily selected from those FA images by nonlinear  
28  
29 registrations; (ii) transform all the aligned FA images into  $1 \times 1 \times 1$  mm<sup>3</sup> MNI152 space by affine  
30  
31 registrations; (iii) create the mean FA image and filter to retain only the center of the WM tracts so as  
32  
33 to create the mean FA skeleton. (iv) project individual subjects' FAs onto mean FA skeleton. (v)  
34  
35 following these steps, data were fed into voxel-wise cross-subject statistical analyses. In all cases, the  
36  
37 null distribution was built up over 5000 permutations, with significance analyzed using independent  
38  
39 t-tests at  $p < 0.05$  levels, uncorrected for multiple comparisons. We determined the anatomic  
40  
41 localization of each cluster by means of the FSL atlas tool, which incorporates several anatomic  
42  
43 templates, including the Harvard-Oxford Cortical Structural Atlas, Harvard-Oxford Subcortical  
44  
45 Structural Atlas, Talairach Daemon Labels, and MNI Structural Atlas.  
46  
47  
48  
49  
50  
51  
52  
53  
54

55  
56 Within the cluster of changed FA,  $\lambda_1$  and  $(\lambda_2+\lambda_3)/2$  were calculated. Data were analyzed using  
57  
58  
59  
60

SPSS. ANOVA statistic identified the differences between groups. Statistical significance was set at  $p < 0.05$ .

## RESULTS

### Physiological and behavioral findings

Compared with the controls, COPD patients had significant decreases in arterial blood  $SaO_2$  ( $p = 0.003$ ) and  $PO_2$  ( $p = 0.006$ ), and increases in arterial blood  $Pco_2$  ( $p < 0.001$ ) and heart rate ( $p < 0.001$ ). Pulmonary function test showed that COPD patients had significant lower one second over forced vital capacity (FVC), forced expiratory volume (FEV), and FEV1/FVC value (all,  $p < 0.001$ ) and higher respiratory rate ( $p = 0.003$ ) compared with the controls.

Compared with the controls, COPD patients had significant lower scores in ADL ( $p < 0.001$ ), MMSE test ( $p < 0.001$ ), visual reproduction ( $p = 0.031$ ), and figure memory ( $p = 0.01$ ). No significant differences were found in the other behavioral tests between the COPD patients and controls.

### GM density

No subject from either group showed visible abnormalities on T1-weighted structural images. VBM analysis showed that COPD patients had decreased GM density compared with healthy controls in the right gyrus rectus, left precentral gyrus, bilateral anterior and middle cingulate gyri, bilateral superior temporal gyri, bilateral anterior insula extending to Rolandic operculum (base of the pre- and post-central gyri), bilateral thalamus/pulvinars, and left caudate nucleus (cluster size  $> 100$  voxels) (Fig. 1, Fig. 2, Fig. 3, Fig. 4, Table 2).

### **FA, longitudinal diffusivity, and radial diffusivity in relation to COPD**

Whole brain voxel-wise statistic analysis showed COPD patients had significantly lower FA in a broad range of brain regions compared with controls (Fig. 5, Table 3). The significantly affected regions (clusters size > 40 voxels) included the superior corona radiata (corresponding to bilateral precuneus and bilateral superior parietal lobules), superior longitudinal fasciculus (bilateral supramarginal gyri), inferior longitudinal fasciculus (left superior temporal gyrus, right middle temporal gyrus, and fusiform gyrus), bilateral optic radiation, bilateral lingual gyri, left parahippocampal gyrus, and fornix.

Lower FA values in these regions were associated with increased radial diffusivity and no changes of longitudinal diffusivity in COPD patients vs. controls (Table 3).

### **Correlations between MRI measurement and disease severity**

The correlations were listed in Table 4. In COPD patients, partial correlation (controlling for disease duration, FEV1/FVC, and age) revealed GM density in the bilateral anterior cingulate cortex, left superior temporal cortex, bilateral insula/superior temporal/Rolandic Operculum, bilateral thalamus/Pulvinar, and left caudate nucleus had positive correlations with arterial blood  $P_{O_2}$ . Partial correlation (controlling for  $P_{O_2}$ , FEV1/FVC, and age) revealed GM density in the bilateral anterior cingulate cortex, right insula/superior temporal/Rolandic Operculum, and right thalamus/Pulvinar had negative correlations with disease duration. The GM density in the left superior temporal lobes and left insula/superior temporal/Rolandic Operculum in COPD patients was significantly correlated with figure memory score. The GM density in left precentral gyrus and left thalamus/Pulvinar in COPD patients was significantly correlated with visual reproduction.

## DISCUSSION

Our present study revealed that COPD patients had decreased regional GM density confined to the limbic and paralimbic structures. GM density in impaired regions in COPD patients had significant positive correlation with arterial blood  $\text{Po}_2$  and negative correlation with disease duration. The decreased WM FA value with increased radial diffusivity value was detected mainly in the visual cortex of occipital lobe, the posterior parietal lobe as well as the temporal lobe. Decreased FA was associated with compromised myelin structure, changes in axonal morphologic structure, and altered interaxonal spacing of fiber bundles.<sup>16</sup> Radial diffusivity measures motion of water molecules perpendicular to fibers and increase of radial diffusivity is interpreted as abnormalities in myelinated membranes.<sup>17</sup> Consequently, decreased FA and increased diffusivity in COPD indicated the impairment of WM microstructural integrity.

### Impaired brain regions are implicated in other subjects suffered from hypoxia

The impaired brain regions in COPD have also been found in other chronic hypoxic diseases. For example, decrease of GM volume/concentration in the gyrus rectus, precentral gyrus, anterior cingulate cortex, multiple sites within the temporal lobes, insular cortex, thalamus, and caudate nucleus were detected in patients with obstructive sleep apnea.<sup>12</sup> Impairments of WM microstructure in the temporal lobe, parietal lobe, fornix, and corona radiata were found in patients with congenital central hypoventilation syndrome.<sup>11</sup> In our previous study, the decrease of GM volume in the anterior insula, anterior cingulate cortex, and precentral cortex were found on high-altitude residents.<sup>9</sup>

### The mechanisms involved in the morphological impairments

1  
2  
3  
4 GM density in impaired regions in COPD patients had strongly positive correlation with the arterial  
5  
6 blood Po<sub>2</sub>, which suggested the impairment in GM may result from low blood oxygen. Moreover, the  
7  
8 GM density in some impaired regions showed negative correlations with disease duration, suggesting  
9  
10 the more GMs were lost with low oxygen persists. It is already known that hypoxia can induce  
11  
12 metabolic decreases<sup>3-5</sup> and cerebral perfusion decline<sup>2</sup> in COPD. In addition, COPD patients often  
13  
14 suffer from systemic inflammation, which can exacerbate neuronal injury.<sup>1</sup> A greater proportion of  
15  
16 regions showing GM loss located in limbic/paralimbic cortex in COPD patients may be due to that  
17  
18 those phylogenetically older regions of the brain showed sharper vascular responses to hypoxia than  
19  
20 evolutionary younger regions.<sup>18</sup>

21  
22  
23  
24  
25  
26  
27  
28  
29 **Morphological impairments play a role in respiratory and cardiovascular responses to dyspnea**  
30  
31 **and hypoxia**

32  
33 Impairment in anterior insula and anterior cingulate cortex could play a role in perception of air hunger.  
34  
35 Various breath control tasks have shown these regions are the components of a larger cortical network  
36  
37 underlying the perception of dyspnea, and among all structures, the anterior insular cortex is suggested  
38  
39 to be an especially crucial brain region.<sup>10</sup> Moreover, the right insular lesions patients showed reduce in  
40  
41 perception of dyspnea.<sup>19</sup> Posterior thalamus has been previously implicated in suppressing the  
42  
43 ventilatory response to hypoxia. Lesions in posterior thalamus abolish hypoxia-induced inhibition of  
44  
45 fetal breathing movements while local electrical stimulation effectively decreases respiratory  
46  
47 frequency.<sup>20</sup> Thus the impaired GM in posterior thalamus may clarify the enhanced breathing  
48  
49 movements in COPD patients.  
50  
51  
52  
53  
54

55  
56 Human studies have shown a central autonomic network made up of limbic systems including the  
57  
58  
59  
60

1  
2  
3  
4 insular cortex and anterior cingulate gyrus play an important role in regulating the cardiovascular  
5  
6 system.<sup>21</sup> Microinjection of opiates into the hippocampus reduced arterial pressure and heart rate, and  
7  
8 the destruction of opiate-producing hippocampal neurons increased blood pressure.<sup>22</sup> Hippocampus has  
9  
10 indirect projections to sympathetic targets, including the adrenal gland and satellite ganglion. The  
11  
12 fornix is the main input and output pathway of the hippocampus. Therefore, decreased GM or impaired  
13  
14 WM in these areas may elucidate cardiovascular disturbances in COPD patients.<sup>1</sup>  
15  
16  
17  
18  
19  
20

### 21 **Morphological impairments contribute to cognitive deficits**

22  
23  
24 In the present study, COPD patients had poorer performance in MMSE, visuospatial memory, and  
25  
26 visual construction task. These results were consistent with that found in previous studies in COPD  
27  
28 patients.<sup>6</sup> In line with the present findings in COPD, we previously found that long-time living at mild  
29  
30 high-altitude hypoxic environment impaired cognitive performances only confined to visual  
31  
32 reproduction and short-time complex figure memory.<sup>23</sup> In our present study, the decreases of GM  
33  
34 density in frontal precentral cortex, insula/superior temporal cortex/Rolandic Operculum, and  
35  
36 thalamus/pulvinar may be responsible for the deficit in visual-related tasks since the GM density in  
37  
38 these areas showed a significantly positive correlation with figure memory or visual reproduction score.  
39  
40  
41  
42  
43 The following previous data may support our findings: (i) Recent research has identified the inferior  
44  
45 frontal cortex served as a source of top-down modulation underlying attention to visual features.<sup>24</sup> (ii)  
46  
47 Studies on patients using fMRI and PET demonstrated Rolandic operculum as one of the visual  
48  
49 structures.<sup>25</sup> (iii) The pulvinar region of the thalamus is known to project to posterior parietal lobe and  
50  
51 inferior temporal lobe. The pulvinar nucleus of the thalamus together with anterior cingulate cortex and  
52  
53 posterior parietal lobe constitutes a network control visual attention.<sup>26</sup> The pulvinar has been implicated  
54  
55  
56  
57  
58  
59  
60

1  
2  
3  
4 in various visual functions in lesion studies.<sup>27</sup>  
5

6 Our present study found the impairments of WM limited to the pathways of visual processing,  
7  
8 including optic radiation, posterior parietal lobe (superior parietal lobule, supramarginal gyrus, and  
9  
10 precuneus), and the inferior temporal fusiform and lingual gyri. Visual information enters the primary  
11  
12 visual cortex via optic radiation to the visual cortex. Cortical areas along the posterior parietal 'dorsal  
13  
14 stream' are primarily concerned with spatial localization and directing attention, while cortical areas  
15  
16 along the inferior temporal 'ventral stream' are mainly concerned with the recognition and  
17  
18 identification of visual stimuli.<sup>28</sup> COPD also showed impaired WM in middle temporal gyrus. Middle  
19  
20 temporal cortex is important for the long-term buildup of perceptual memory for ambiguous motion  
21  
22 stimuli.<sup>29</sup> Based on the above data, our findings in WM may also clarify the mechanisms underling the  
23  
24 deficit in visual-related tasks. In addition, impaired WM in input and output fibers of hippocampus  
25  
26 (fornix) may be related to the deficit in MMSE. Previous study on patients with Alzheimer's disease  
27  
28 found the volumes of hippocampus were significantly reduced and the volumes of the left hippocampus  
29  
30 correlated significantly with the MMSE score.<sup>30</sup> The limitation of our study is the weak statistical  
31  
32 power of FA value analysis, because the results obtained in the TBSS analysis could not survive  
33  
34 multiple comparison correction.  
35  
36  
37  
38  
39  
40  
41  
42  
43  
44  
45

#### 46 **Morphological impairments contribute to the depression**

47

48 Several researches revealed that depression involved the dorsal prefrontal cortices, anterior cingulate  
49  
50 cortex, and the basal ganglia.<sup>31</sup> Insular cortex played an important role in anxiety disorders through its  
51  
52 mediation of interoceptive processing.<sup>32</sup> Decreased bilateral lingual gyrus and caudate nucleus volume  
53  
54 were found in major depression.<sup>33,34</sup> The connections of thalamus with prefrontal  
55  
56  
57  
58  
59  
60

1  
2  
3  
4 cortico-striato-pallidus loop and amygdalo-striato-pallidus loop have been implicated in mood  
5  
6 disorders.<sup>35</sup> Taken together, the loss of GM in these structures possibly contributes to mood symptoms  
7  
8 of COPD.<sup>1</sup>  
9

### 10 11 12 13 14 **Conclusions**

15  
16 In summary, we first demonstrated that COPD extended beyond the lung to the brain, with the decrease  
17  
18 of regional GM density accompanied by impairment in the WM microstructural integrity. Our findings  
19  
20 suggest significant participation of these structures in responding to hypoxic challenges, which include  
21  
22 cardiovascular and air-hunger components. The brain structural changes may also underlie the  
23  
24 psychological and mood changes of COPD.  
25  
26  
27  
28  
29  
30

### 31 **Authors' contributions**

32  
33  
34 *Haiyan Zhang*: contributed to the study design, take responsibility for the integrity of the data, the  
35  
36 accuracy of the data analysis.  
37

38  
39 *Xiaochuan Wang*: contributed to the study design, collection, analysis, and interpretation of data, and  
40  
41 critical review.  
42

43  
44 *Jianzhong Lin*: contributed to the collection, analysis, and interpretation of data.  
45

46  
47 *Yingchun Sun*: contributed to the collection, analysis, and interpretation of data.  
48

49  
50 *Yongxia Huang*: contributed to the collection, analysis, and interpretation of data.  
51

52  
53 *Tianhe Yang*: contributed to the collection, analysis, and interpretation of data.  
54

55  
56 *Shili Zheng*: contributed to the collection, analysis, and interpretation of data.  
57

58  
59  
60 *Ming Fan*: contributed to the study design, drafting, critical review, and final approval of the



1  
2  
3  
4 manuscript.

5  
6 *Jiaxing Zhang*: contributed to conception and design, interpretation of data, drafting the article, and

7  
8 final approval of the manuscript.  
9  
10  
11  
12  
13  
14  
15  
16  
17  
18  
19  
20  
21  
22  
23  
24  
25  
26  
27  
28  
29  
30  
31  
32  
33  
34  
35  
36  
37  
38  
39  
40  
41  
42  
43  
44  
45  
46  
47  
48  
49  
50  
51  
52  
53  
54  
55  
56  
57  
58  
59  
60

For peer review only

**Table 1** Demographic characteristics of the patients with COPD and healthy volunteers

|                                   | COPD patients            | Controls                  | p    |
|-----------------------------------|--------------------------|---------------------------|------|
| Number of subjects                | 25                       | 25                        |      |
| Gender (female) (%)               | 16                       | 16                        |      |
| Age (years) (mean $\pm$ SD)       | 69.2 $\pm$ 8.1 (58 - 84) | 67.96 $\pm$ 8.0 (57 - 86) | 0.59 |
| Education (years) (mean $\pm$ SD) | 6.7 $\pm$ 3.9            | 7.5 $\pm$ 5.0             | 0.53 |
| Family history of COPD (%)        | 4                        | -                         |      |
| Disease duration (years)          | 7.0 $\pm$ 5.7            | -                         |      |
| Actual smokers (%)                | 44                       | 40                        | 0.86 |

**Table 2** Regional information of decreased grey matter density (cluster size > 100 voxels) in COPD patients compared with healthy controls

| Area                                 | Volume<br>(mm <sup>3</sup> ) | Brodmann<br>areas | MNI coordinate |     |     | t-score<br>(peak) |
|--------------------------------------|------------------------------|-------------------|----------------|-----|-----|-------------------|
|                                      |                              |                   | x              | y   | z   |                   |
| Rectus_R                             | 118                          | 11                | 9              | 39  | -20 | 4.31              |
| Precentral_L                         | 100                          | 6                 | -51            | -5  | 33  | 4.95              |
| Cingulum_Ant_R                       | 485                          | 32                | 8              | 38  | 17  | 5.88              |
| Cingulum_Ant_L                       | 212                          | 32                | -8             | 38  | 18  | 4.49              |
| Cingulum_Mid_R                       | 157                          | 24                | 6              | -9  | 42  | 4.87              |
| Cingulum_Mid_L                       | 136                          | 24                | -6             | -9  | 41  | 4.91              |
| Temporal_Sup_L                       | 280                          | 22/42             | -60            | -33 | 3   | 4.99              |
| Temporal_Sup/ Rolandic_Oper_L        | 837                          | 22                | -57            | -14 | 10  | 4.91              |
| Insula/Temporal_Sup/ Rolandic_Oper_R | 2821                         | 13/22/47          | 44             | 11  | -5  | 5.15              |
| Insula/Temporal_Sup/ Rolandic_Oper_L | 1551                         | 13/22/47          | -33            | 12  | -15 | 4.48              |
| Thalamus/Pulvinar_L                  | 1270                         |                   | -12            | -30 | 3   | 6.46              |
| Thalamus/Pulvinar_R                  | 2210                         |                   | 12             | -26 | 8   | 5.29              |
| Caudate_L                            | 212                          |                   | -9             | 14  | 14  | 4.19              |

**Table 3** Main regions showing FA,  $\lambda_1$ ,  $\lambda_2$ ,  $\lambda_3$  values in COPD patients compared with healthy controls

| MNI (peak) |     |     | Voxels<br>(mm <sup>3</sup> ) | White matter<br>tract | Corresponding cortical area    | FA value     |              | $\lambda_1$ ( $\times 10^3$ mm <sup>2</sup> /s) |               | $\lambda_2$ ( $\times 10^3$ mm <sup>2</sup> /s) |               |
|------------|-----|-----|------------------------------|-----------------------|--------------------------------|--------------|--------------|-------------------------------------------------|---------------|-------------------------------------------------|---------------|
| x          | y   | z   |                              |                       |                                | COPD         | Control      | COPD                                            | Control       | COPD                                            | Control       |
| 1          | 10  | 16  | 240                          | Fornix                | Fornix                         | 0.248(0.067) | 0.289(0.073) | 2.586(0.314)                                    | 2.406(0.0321) | 1.809(0.295)                                    | 1.577(0.262)* |
| -26        | -69 | 1   | 191                          | Lingual gyrus         | Left lingual gyrus             | 0.259(0.042) | 0.283(0.046) | 1.450(0.240)                                    | 1.370(0.224)  | 0.992(0.185)                                    | 0.896(0.168)* |
| 27         | -53 | 3   | 147                          | Lingual gyrus         | Right lingual gyrus            | 0.265(0.065) | 0.290(0.056) | 1.381(0.239)                                    | 1.346(0.227)  | 0.955(0.242)                                    | 0.891(0.215)* |
| -23        | -19 | -24 | 77                           | Parahippocampus       | Left parahippocampus           | 0.268(0.042) | 0.319(0.046) | 1.234(0.057)                                    | 1.189(0.052)  | 0.869(0.148)                                    | 0.771(0.125)* |
| 38         | -24 | -24 | 77                           | fusiform gyrus        | Right fusiform gyrus           | 0.231(0.037) | 0.248(0.046) | 1.053(0.063)                                    | 1.094(0.073)  | 0.774(0.030)                                    | 0.723(0.032)* |
| -10        | -91 | 17  | 204                          | Optic radiation       | Left occipital cortex          | 0.234(0.043) | 0.277(0.041) | 1.037(0.038)                                    | 1.020(0.031)  | 0.752(0.063)                                    | 0.693(0.051)* |
| 25         | -86 | -5  | 200                          | Optic radiation       | Right occipital cortex         | 0.369(0.099) | 0.409(0.122) | 1.171(0.014)                                    | 1.177(0.171)  | 0.649(0.057)                                    | 0.601(0.071)* |
| -9         | -72 | 45  | 94                           | SCR                   | Left precuneus                 | 0.283(0.053) | 0.317(0.056) | 1.099(0.032)                                    | 1.069(0.041)  | 0.726(0.075)                                    | 0.665(0.065)* |
| 9          | -66 | 37  | 57                           | SCR                   | Right precuneus                | 0.251(0.030) | 0.280(0.044) | 1.044(0.032)                                    | 1.018(0.023)  | 0.868(0.073)                                    | 0.731(0.084)* |
| -15        | -51 | 62  | 57                           | SCR                   | Left superior parietal lobule  | 0.267(0.043) | 0.294(0.043) | 1.130(0.051)                                    | 1.082(0.025)  | 0.724(0.039)                                    | 0.671(0.045)* |
| 16         | -45 | 64  | 66                           | SCR                   | Right superior parietal lobule | 0.251(0.043) | 0.294(0.051) | 1.176(0.117)                                    | 1.107(0.094)  | 0.805(0.056)                                    | 0.762(0.056)* |
| -45        | -53 | 31  | 44                           | SLF                   | Left supramarginal gyrus       | 0.221(0.027) | 0.239(0.026) | 1.088(0.020)                                    | 1.076(0.040)  | 0.935(0.090)                                    | 0.873(0.071)* |
| 37         | -68 | 21  | 63                           | SLF                   | Right supramarginal gyrus      | 0.220(0.025) | 0.237(0.025) | 1.116(0.039)                                    | 1.090(0.052)  | 0.773(0.076)                                    | 0.715(0.007)* |
| -48        | 0   | -16 | 43                           | ILF                   | Left superior temporal gyrus   | 0.244(0.013) | 0.270(0.021) | 1.060(0.030)                                    | 0.984(0.015)  | 0.758(0.025)                                    | 0.714(0.037)* |
| 53         | -46 | -6  | 41                           | ILF                   | Right middle temporal gyrus    | 0.206(0.016) | 0.241(0.024) | 1.025(0.016)                                    | 1.006(0.021)  | 1.605(0.167)                                    | 1.340(0.139)* |

ILF, inferior longitudinal fasciculus; SCR, superior corona radiata; SLF, superior longitudinal fasciculus. Data are presented as means (SD). \*p<0.05.

**Table 4** Correlations of grey matter density in impaired regions with Po<sub>2</sub>, disease duration, and cognitive performances in patients with COPD

| Area                                | Po <sub>2</sub>   | Disease duration  | Cognitive performances |                     |
|-------------------------------------|-------------------|-------------------|------------------------|---------------------|
|                                     |                   |                   | figure memory          | visual reproduction |
| Precentral_L                        |                   |                   |                        | r=0.503, p=0.048    |
| Cingulum_Ant_R                      | r=0.530, p=0.017  | r=-0.524, p=0.019 |                        |                     |
| Cingulum_Ant_L                      | r=0.744, p <0.001 | r=-0.531, p=0.017 |                        |                     |
| Cingulum_Mid_R                      |                   |                   |                        |                     |
| Cingulum_Mid_L                      |                   |                   |                        |                     |
| Temporal_Sup_L                      | r=0.681, p=0.002  |                   | r=0.642, p=0.012       |                     |
| Temporal_Sup/Rolandic_Oper_L        |                   |                   |                        |                     |
| Insula/Temporal_Sup/Rolandic_Oper_R | r=0.559, p=0.012  | r=-0.528, p=0.018 |                        |                     |
| Insula/Temporal_Sup/Rolandic_Oper_L | r=0.570, p=0.011  |                   | r=0.585, p=0.023       |                     |
| Thalamus/Pulvinar_L                 | r=0.476, p=0.031  |                   |                        | r=0.520, p=0.042    |
| Thalamus/Pulvinar_R                 | r=0.499, p=0.024  | r=-0.533, p=0.017 |                        |                     |
| Caudate_L                           | r=0.541, p=0.015  |                   |                        |                     |

## REFERENCES

1. Barnes PJ. Chronic obstructive pulmonary disease: effects beyond the lungs. *PLoS Med* 2010; 7:e1000220.
2. Ortapamuk H, Naldoken S. Brain perfusion abnormalities in chronic obstructive pulmonary disease: comparison with cognitive impairment. *Ann Nucl Med* 2006; 20:99-106.
3. Shim TS, Lee JH, Kim SY, *et al.* Cerebral metabolic abnormalities in COPD patients detected by localized proton magnetic resonance spectroscopy. *Chest* 2001; 120:1506-13.
4. Sicard KM, Duong TQ. Effects of hypoxia, hyperoxia, and hypercapnia on baseline and stimulus-evoked BOLD, CBF, and CMRO2 in spontaneously breathing animals. *Neuroimage* 2005; 25:850-8.
5. Sinha S, Kumar V, Jagannathan NR, *et al.* Proton magnetic resonance spectroscopy of brain to study the cerebral metabolic abnormalities in COPD patients: a case control study in north India. *Indian J Chest Dis Allied Sci* 2009; 51:15-9.
6. Dodd JW, Getov SV, Jones PW. Cognitive function in COPD. *Eur Respir J* 2010; 35:913-22.
7. Smith SM, Jenkinson M, Johansen-Berg H, *et al.* Tract-based spatial statistics: voxelwise analysis of multi-subject diffusion data. *Neuroimage* 2006; 31:1487-505.
8. Ashburner J. A fast diffeomorphic image registration algorithm. *Neuroimage* 2007; 38:95-113.
9. Zhang J, Yan X, Shi J, *et al.* Structural modifications of the brain in acclimatization to high-altitude. *PLoS One* 2010; 5:e11449.
10. von Leupoldt A, Dahme B. Cortical substrates for the perception of dyspnea. *Chest* 2005; 128:345-54.
11. Kumar R, Macey PM, Woo MA, *et al.* Diffusion tensor imaging demonstrates brainstem and

- 1  
2  
3 cerebellar abnormalities in congenital central hypoventilation syndrome. *Pediatr Res* 2008;  
4  
5  
6 64:275-80.  
7  
8  
9 12. Joo EY, Tae WS, Lee MJ, *et al.* Reduced brain gray matter concentration in patients with  
10  
11 obstructive sleep apnea syndrome. *Sleep* 2010; 33:235-41.  
12  
13  
14 13. Pauwels RA, Buist AS, Calverley PM, *et al.* Global strategy for the diagnosis, management, and  
15  
16 prevention of chronic obstructive pulmonary disease. NHLBI/WHO Global Initiative for  
17  
18 Chronic Obstructive Lung Disease (GOLD) Workshop summary. *Am J Respir Crit Care Med*  
19  
20 2001; 163:1256-76.  
21  
22  
23  
24 14. Lawton MP, Brody EM. Assessment of older people: self-maintaining and instrumental activities  
25  
26 of daily living. *Gerontologist* 1969; 9:179-86.  
27  
28  
29 15. Jenkinson M, Smith S. A global optimisation method for robust affine registration of brain images.  
30  
31 *Med Image Anal* 2001; 5:143-56.  
32  
33  
34 16. Beaulieu C. The basis of anisotropic water diffusion in the nervous system - a technical review.  
35  
36 *NMR Biomed* 2002; 15:435-55.  
37  
38  
39 17. Song SK, Sun SW, Ramsbottom MJ, *et al.* Dysmyelination revealed through MRI as increased  
40  
41 radial (but unchanged axial) diffusion of water. *Neuroimage* 2002; 17:1429-36.  
42  
43  
44 18. Binks AP, Cunningham VJ, Adams L, *et al.* Gray matter blood flow change is unevenly distributed  
45  
46 during moderate isocapnic hypoxia in humans. *J Appl Physiol* 2008; 104:212-7.  
47  
48  
49 19. Schon D, Rosenkranz M, Regelsberger J, *et al.* Reduced perception of dyspnea and pain after right  
50  
51 insular cortex lesions. *Am J Respir Crit Care Med* 2008; 178:1173-79.  
52  
53  
54 20. Teppema LJ, Dahan A. The ventilatory response to hypoxia in mammals: mechanisms,  
55  
56 measurement, and analysis. *Physiol Rev* 2010; 90:675-754.  
57  
58  
59  
60

- 1  
2  
3  
4 21. Nagai M, Hoshide S, Kario K. The insular cortex and cardiovascular system: a new insight into the  
5  
6 brain-heart axis. *J Am Soc Hypertens* 2010; 4:174-82.  
7  
8  
9 22. Macefield VG, Gandevia SC, Henderson LA. Neural sites involved in the sustained increase in  
10  
11 muscle sympathetic nerve activity induced by inspiratory capacity apnea: a fMRI study. *J Appl*  
12  
13 *Physiol* 2006; 100:266-73.  
14  
15  
16 23. Zhang J, Liu H, Yan X, *et al.* Minimal effects on human memory following long-term living at  
17  
18 moderate altitude. *High Alt Med Biol* 2011; 12:37-43.  
19  
20  
21 24. Zanto TP, Rubens MT, Bollinger J, *et al.* Top-down modulation of visual feature processing: the  
22  
23 role of the inferior frontal junction. *Neuroimage* 2010; 53:736-45.  
24  
25  
26 25. Fried I, Nenov VI, Ojemann SG, *et al.* Functional MR and PET imaging of rolandic and visual  
27  
28 cortices for neurosurgical planning. *J Neurosurg* 1995; 83:854-61.  
29  
30  
31 26. Heinze HJ, Mangun GR, Burchert W, *et al.* Combined spatial and temporal imaging of brain  
32  
33 activity during visual selective attention in humans. *Nature* 1994; 372:543-6.  
34  
35  
36 27. Arend I, Machado L, Ward R, *et al.* The role of the human pulvinar in visual attention and action:  
37  
38 evidence from temporal-order judgment, saccade decision, and antisaccade tasks. *Prog Brain*  
39  
40 *Res* 2008; 171:475-83.  
41  
42  
43 28. Itti L, Koch C. Computational modelling of visual attention. *Nat Rev Neurosci* 2001; 2:194-203  
44  
45  
46 29. Brascamp JW, Kanai R, Walsh V, *et al.* Human middle temporal cortex, perceptual bias, and  
47  
48 perceptual memory for ambiguous three-dimensional motion. *J Neurosci* 2010; 30:760-6.  
49  
50  
51 30. Laakso MP, Soininen H, Partanen K, *et al.* Volumes of hippocampus, amygdala and frontal lobes  
52  
53 in the MRI-based diagnosis of early Alzheimer's disease: correlation with memory functions. *J*  
54  
55 *Neural Transm Park Dis Dement Sect* 1995; 9:73-86.  
56  
57  
58  
59  
60



- 1  
2  
3  
4 31. Canbeyli R. Sensorimotor modulation of mood and depression: an integrative review. *Behav Brain*  
5  
6 *Res* 2010; 207:249-64.  
7  
8  
9 32. Stein MB, Stein DJ. Social anxiety disorder. *Lancet* 2008; 371:1115-25.  
10  
11 33. Veer IM, Beckmann CF, van Tol MJ, *et al*. Whole brain resting-state analysis reveals decreased  
12  
13 functional connectivity in major depression. *Front Syst Neurosci* 2010; 4: 41.  
14  
15 34. Baumann B, Danos P, Krell D, *et al*. Reduced volume of limbic system-affiliated basal ganglia in  
16  
17 mood disorders: preliminary data from a postmortem study. *J Neuropsychiatry Clin Neurosci*  
18  
19 1999; 11:71-8.  
20  
21  
22  
23 35. Price JL, Drevets WC. Neurocircuitry of mood disorders. *Neuropsychopharmacology* 2010;  
24  
25 35:192-216.  
26  
27  
28  
29  
30  
31  
32  
33  
34  
35  
36  
37  
38  
39  
40  
41  
42  
43  
44  
45  
46  
47  
48  
49  
50  
51  
52  
53  
54  
55  
56  
57  
58  
59  
60

1  
2  
3  
4  
5  
6  
7  
8  
9  
10  
11  
12  
13  
14  
15  
16  
17  
18  
19  
20  
21  
22  
23  
24  
25  
26  
27  
28  
29  
30  
31  
32  
33  
34  
35  
36  
37  
38  
39  
40  
41  
42  
43  
44  
45  
46  
47  
48  
49  
50  
51  
52  
53  
54  
55  
56  
57  
58  
59  
60

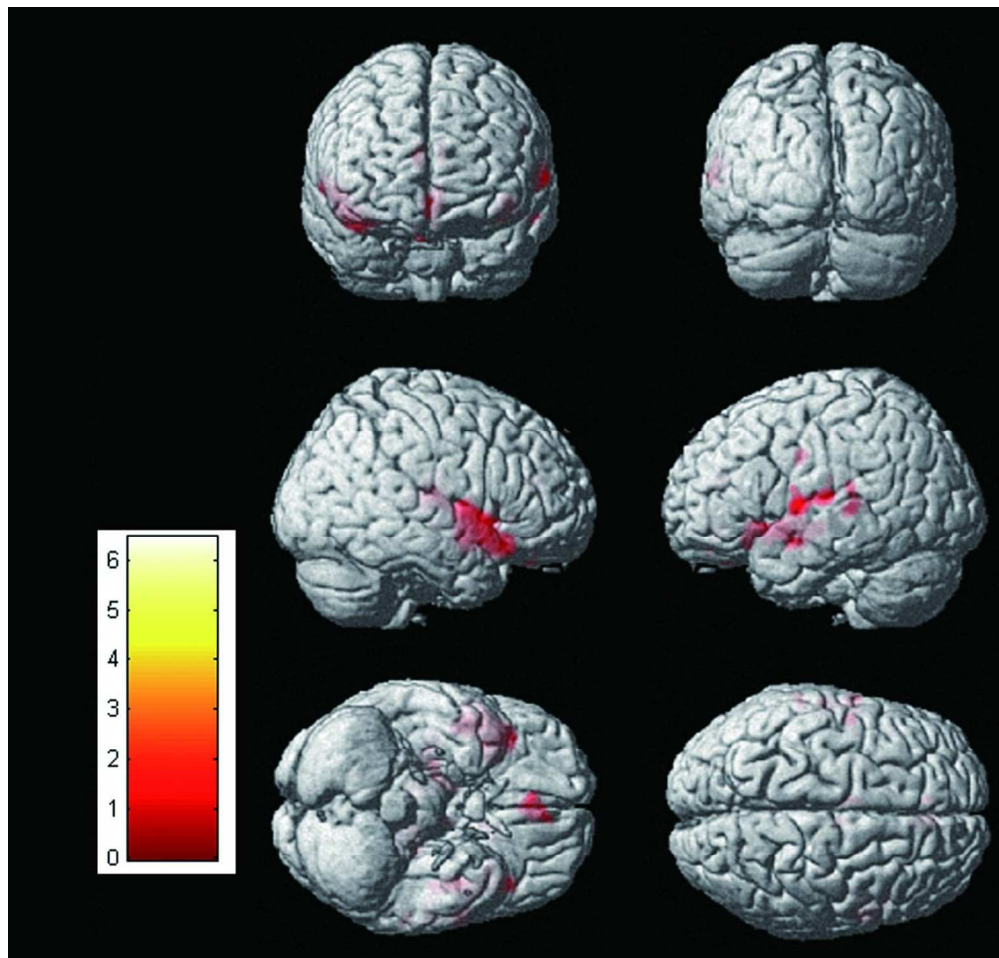

Figure 1 A statistical parametric map for grey matter density reduced in COPD patients vs. healthy controls ( $p_{FDR\_corrected} < 0.01$ ) overlaid on the MNI template.

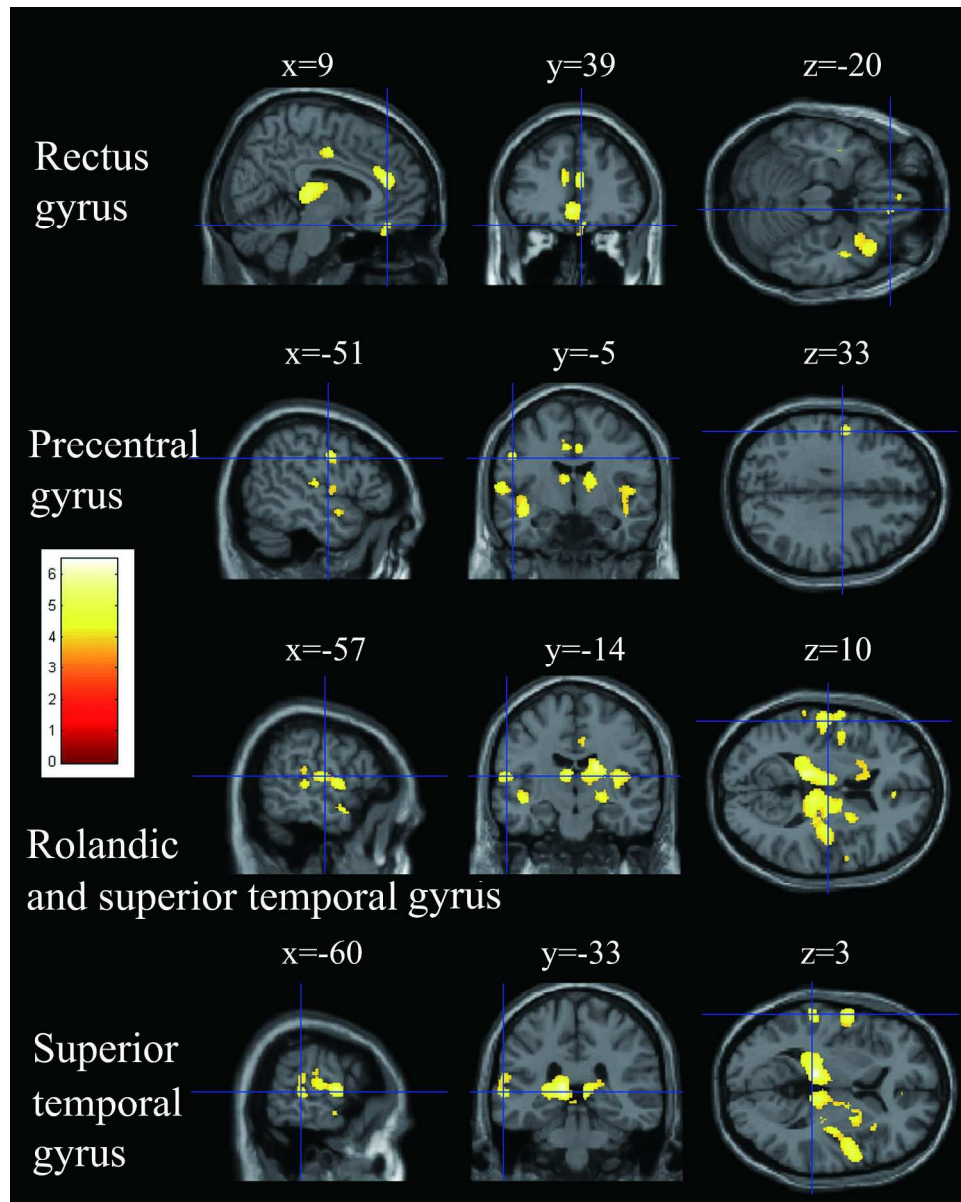

46  
47  
48  
49  
50  
51  
52  
53  
54  
55  
56  
57  
58  
59  
60

Figure 2 Grey matter density decrease in COPD patients vs. healthy controls. Three-dimensional slices depicting regions showing reduced grey matter in the right gyrus rectus, left precentral gyrus, left Rolandic operculum and superior temporal gyrus overlaid on a T1-weighted MRI anatomical image in the MNI template.

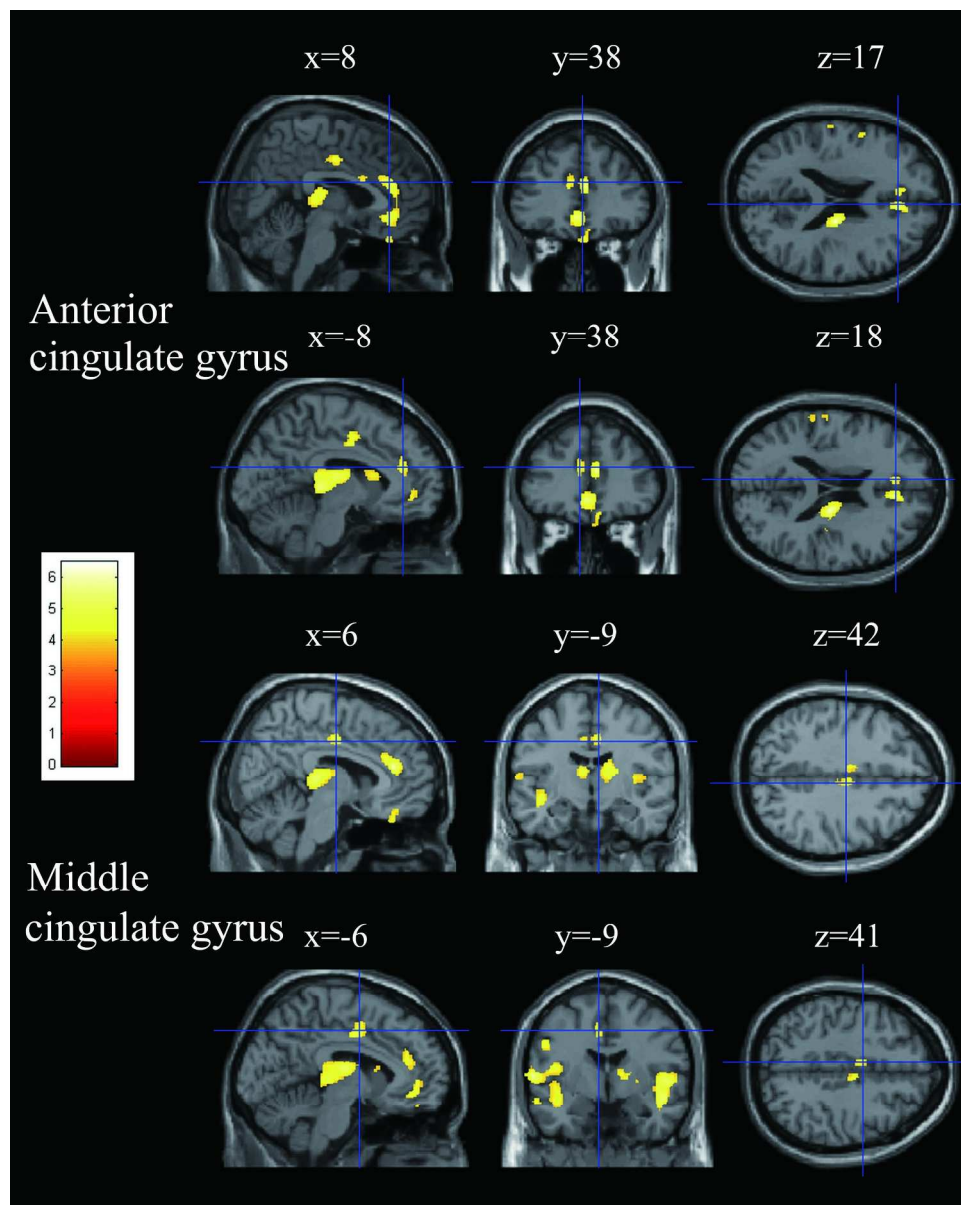

46  
47  
48  
49  
50  
51  
52  
53  
54  
55  
56  
57  
58  
59  
60

Figure 3 Grey matter density decrease in COPD patients vs. healthy controls. Three-dimensional slices depicting regions showing reduced grey matter in the bilateral anterior and middle cingulate gyri overlaid on a T1-weighted MRI anatomical image in the MNI template.

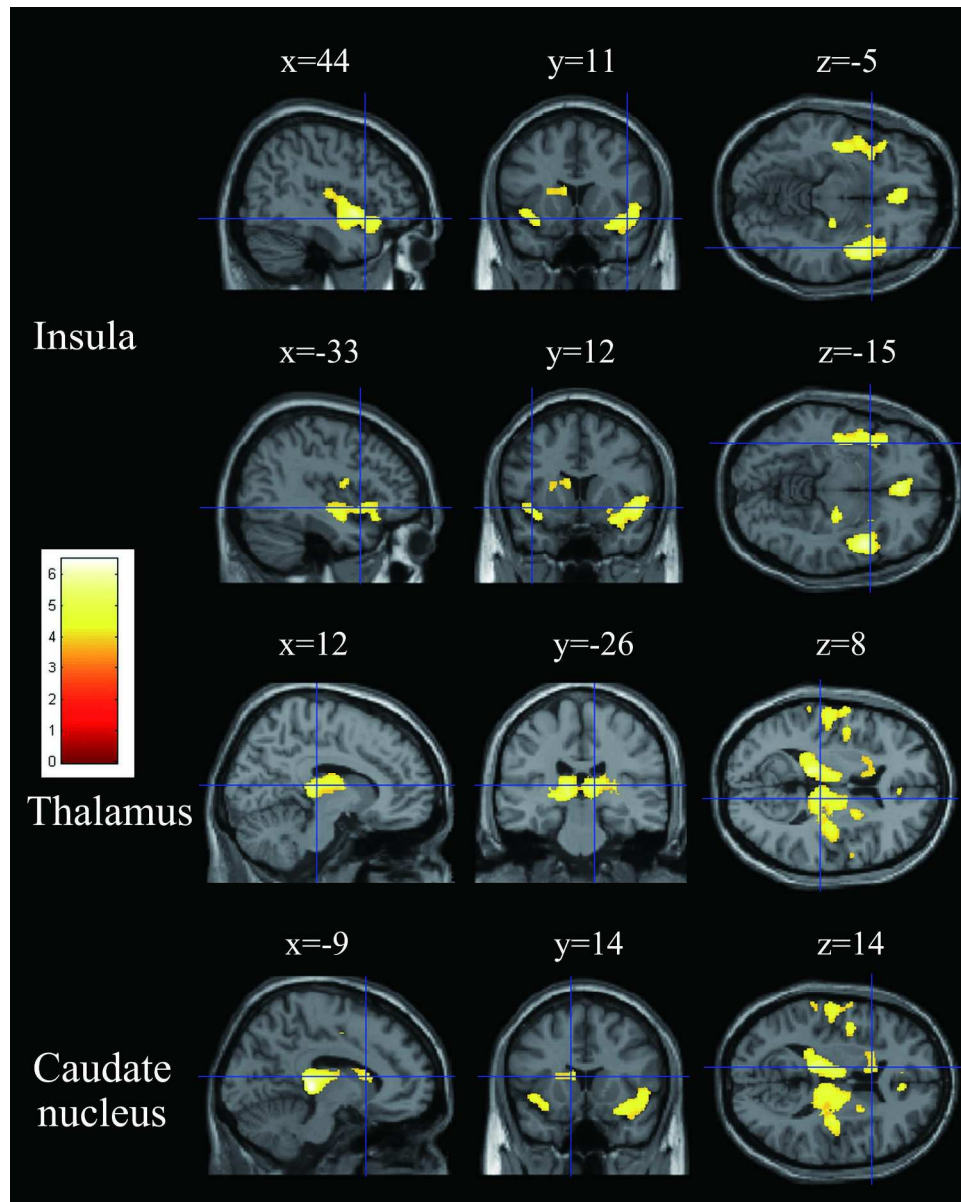

46  
47  
48  
49  
50  
51  
52  
53  
54  
55  
56  
57  
58  
59  
60

Figure 4 Grey matter density decrease in COPD patients vs. healthy controls. Three-dimensional slices depicting regions showing reduced grey matter in the bilateral insula, bilateral thalamus, and left caudate nucleus overlaid on a T1-weighted MRI anatomical image in the MNI template.



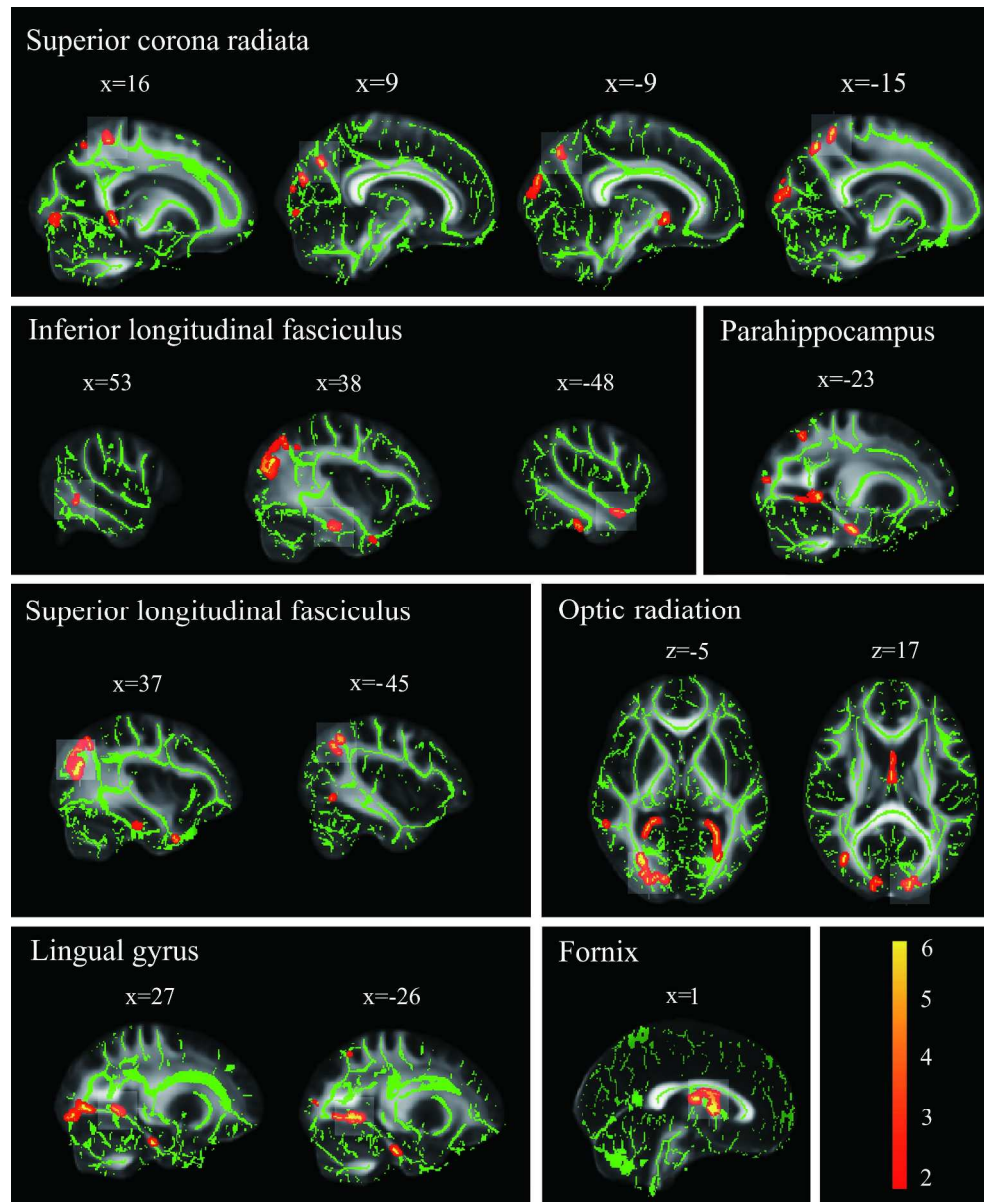

Figure 5 Statistical maps of group comparison of FA value on a voxel-wise basis (results of TBSS). The group's mean FA skeleton (green) was overlaid on the MNI template. The threshold of mean FA skeleton was set at 0.2. COPD patients show significantly lower FA value than healthy controls ( $p < 0.05$ ).

STROBE 2007 (v4) Statement—Checklist of items that should be included in reports of *case-control studies*

| Section/Topic                | Item # | Recommendation                                                                                                                                                                       | Reported on page # |
|------------------------------|--------|--------------------------------------------------------------------------------------------------------------------------------------------------------------------------------------|--------------------|
| Title and abstract           | 1      | (a) Indicate the study's design with a commonly used term in the title or the abstract                                                                                               | 1                  |
|                              |        | (b) Provide in the abstract an informative and balanced summary of what was done and what was found                                                                                  | 2                  |
| <b>Introduction</b>          |        |                                                                                                                                                                                      |                    |
| Background/rationale         | 2      | Explain the scientific background and rationale for the investigation being reported                                                                                                 | 4                  |
| Objectives                   | 3      | State specific objectives, including any prespecified hypotheses                                                                                                                     | 4 and 5            |
| <b>Methods</b>               |        |                                                                                                                                                                                      |                    |
| Study design                 | 4      | Present key elements of study design early in the paper                                                                                                                              | 5                  |
| Setting                      | 5      | Describe the setting, locations, and relevant dates, including periods of recruitment, exposure, follow-up, and data collection                                                      | 5                  |
| Participants                 | 6      | (a) Give the eligibility criteria, and the sources and methods of case ascertainment and control selection. Give the rationale for the choice of cases and controls                  | 5 and 6            |
|                              |        | (b) For matched studies, give matching criteria and the number of controls per case                                                                                                  | 5                  |
| Variables                    | 7      | Clearly define all outcomes, exposures, predictors, potential confounders, and effect modifiers. Give diagnostic criteria, if applicable                                             | 5                  |
| Data sources/<br>measurement | 8*     | For each variable of interest, give sources of data and details of methods of assessment (measurement). Describe comparability of assessment methods if there is more than one group | 6                  |
| Bias                         | 9      | Describe any efforts to address potential sources of bias                                                                                                                            |                    |
| Study size                   | 10     | Explain how the study size was arrived at                                                                                                                                            |                    |
| Quantitative variables       | 11     | Explain how quantitative variables were handled in the analyses. If applicable, describe which groupings were chosen and why                                                         |                    |
| Statistical methods          | 12     | (a) Describe all statistical methods, including those used to control for confounding                                                                                                | 6 - 8              |
|                              |        | (b) Describe any methods used to examine subgroups and interactions                                                                                                                  | 6 - 8              |
|                              |        | (c) Explain how missing data were addressed                                                                                                                                          |                    |
|                              |        | (d) If applicable, explain how matching of cases and controls was addressed                                                                                                          |                    |
|                              |        | (e) Describe any sensitivity analyses                                                                                                                                                | 6 - 8              |
| <b>Results</b>               |        |                                                                                                                                                                                      |                    |

|                          |     |                                                                                                                                                                                                                                                                                                                                                                                                               |          |
|--------------------------|-----|---------------------------------------------------------------------------------------------------------------------------------------------------------------------------------------------------------------------------------------------------------------------------------------------------------------------------------------------------------------------------------------------------------------|----------|
| Participants             | 13* | (a) Report numbers of individuals at each stage of study—eg numbers potentially eligible, examined for eligibility, confirmed eligible, included in the study, completing follow-up, and analysed<br>(b) Give reasons for non-participation at each stage<br>(c) Consider use of a flow diagram                                                                                                               | 5        |
| Descriptive data         | 14* | (a) Give characteristics of study participants (eg demographic, clinical, social) and information on exposures and potential confounders<br>(b) Indicate number of participants with missing data for each variable of interest                                                                                                                                                                               | 17       |
| Outcome data             | 15* | Report numbers in each exposure category, or summary measures of exposure                                                                                                                                                                                                                                                                                                                                     |          |
| Main results             | 16  | (a) Give unadjusted estimates and, if applicable, confounder-adjusted estimates and their precision (eg, 95% confidence interval). Make clear which confounders were adjusted for and why they were included<br>(b) Report category boundaries when continuous variables were categorized<br>(c) If relevant, consider translating estimates of relative risk into absolute risk for a meaningful time period | 9 and 10 |
| Other analyses           | 17  | Report other analyses done—eg analyses of subgroups and interactions, and sensitivity analyses                                                                                                                                                                                                                                                                                                                |          |
| <b>Discussion</b>        |     |                                                                                                                                                                                                                                                                                                                                                                                                               |          |
| Key results              | 18  | Summarise key results with reference to study objectives                                                                                                                                                                                                                                                                                                                                                      | 11       |
| Limitations              | 19  | Discuss limitations of the study, taking into account sources of potential bias or imprecision. Discuss both direction and magnitude of any potential bias                                                                                                                                                                                                                                                    |          |
| Interpretation           | 20  | Give a cautious overall interpretation of results considering objectives, limitations, multiplicity of analyses, results from similar studies, and other relevant evidence                                                                                                                                                                                                                                    | 11-15    |
| Generalisability         | 21  | Discuss the generalisability (external validity) of the study results                                                                                                                                                                                                                                                                                                                                         |          |
| <b>Other information</b> |     |                                                                                                                                                                                                                                                                                                                                                                                                               |          |
| Funding                  | 22  | Give the source of funding and the role of the funders for the present study and, if applicable, for the original study on which the present article is based                                                                                                                                                                                                                                                 | 3        |

\*Give information separately for cases and controls in case-control studies and, if applicable, for exposed and unexposed groups in cohort and cross-sectional studies.

**Note:** An Explanation and Elaboration article discusses each checklist item and gives methodological background and published examples of transparent reporting. The STROBE checklist is best used in conjunction with this article (freely available on the Web sites of PLoS Medicine at <http://www.plosmedicine.org/>, Annals of Internal Medicine at <http://www.annals.org/>, and Epidemiology at <http://www.epidem.com/>). Information on the STROBE Initiative is available at [www.strobe-statement.org](http://www.strobe-statement.org).





**Grey and white matter abnormalities in chronic obstructive pulmonary disease: a case-control study**

|                                 |                                                                                                                                                                                                                                                                                                                                                                                                                                                                                                                                                                                                                                                                                                                                                                                                                                                                                                                                                      |
|---------------------------------|------------------------------------------------------------------------------------------------------------------------------------------------------------------------------------------------------------------------------------------------------------------------------------------------------------------------------------------------------------------------------------------------------------------------------------------------------------------------------------------------------------------------------------------------------------------------------------------------------------------------------------------------------------------------------------------------------------------------------------------------------------------------------------------------------------------------------------------------------------------------------------------------------------------------------------------------------|
| Journal:                        | <i>BMJ Open</i>                                                                                                                                                                                                                                                                                                                                                                                                                                                                                                                                                                                                                                                                                                                                                                                                                                                                                                                                      |
| Manuscript ID:                  | bmjopen-2012-000844.R1                                                                                                                                                                                                                                                                                                                                                                                                                                                                                                                                                                                                                                                                                                                                                                                                                                                                                                                               |
| Article Type:                   | Research                                                                                                                                                                                                                                                                                                                                                                                                                                                                                                                                                                                                                                                                                                                                                                                                                                                                                                                                             |
| Date Submitted by the Author:   | 14-Feb-2012                                                                                                                                                                                                                                                                                                                                                                                                                                                                                                                                                                                                                                                                                                                                                                                                                                                                                                                                          |
| Complete List of Authors:       | zhang, haiyan; Department of Physiology and Neurobiology, Medical College of Xiamen University, Xiamen<br>wang, xiaochuan; Department of Neurology, the Affiliated Hospital of Hangzhou Normal University<br>lin, Jianzhong; Magnetic Resonance Center, Zhongshan Hospital, Medical College of Xiamen University<br>sun, Yinchuan; Department of Physiology and Neurobiology, Medical College of Xiamen University, Xiamen<br>huang, Yongxia; Department of Physiology and Neurobiology, Medical College of Xiamen University, Xiamen<br>yang, Tianhe; Magnetic Resonance Center, Zhongshan Hospital, Medical College of Xiamen University<br>zheng, Shili; Departments of Respiratory, Zhongshan Hospital, Medical College of Xiamen University<br>fan, ming; Department of Brain Protection and Plasticity, Institute of Basic Medical Sciences<br>Zhang, Jiaying; Department of Physiology and Neurobiology, Medical College of Xiamen University |
| <b>Primary Subject Heading</b>: | Radiology and imaging                                                                                                                                                                                                                                                                                                                                                                                                                                                                                                                                                                                                                                                                                                                                                                                                                                                                                                                                |
| Secondary Subject Heading:      | Neurology                                                                                                                                                                                                                                                                                                                                                                                                                                                                                                                                                                                                                                                                                                                                                                                                                                                                                                                                            |
| Keywords:                       | Adult intensive & critical care < INTENSIVE & CRITICAL CARE, Neuroradiology < NEUROLOGY, Magnetic resonance imaging < RADIOLOGY & IMAGING                                                                                                                                                                                                                                                                                                                                                                                                                                                                                                                                                                                                                                                                                                                                                                                                            |
|                                 |                                                                                                                                                                                                                                                                                                                                                                                                                                                                                                                                                                                                                                                                                                                                                                                                                                                                                                                                                      |

SCHOLARONE™  
Manuscripts

# Grey and white matter abnormalities in chronic obstructive pulmonary disease: a case-control study

Haiyan Zhang<sup>1#</sup>, Xiaochuan Wang<sup>2#</sup>, Jianzhong Lin<sup>3</sup>, Yinchuan Sun<sup>1</sup>, Yongxia Huang<sup>1</sup>, Tianhe

Yang<sup>3</sup>, Shili Zheng<sup>4</sup>, Ming Fan<sup>5</sup>, Jiaying Zhang<sup>\*1</sup>

1 Department of Physiology and Neurobiology, Medical College of Xiamen University, Xiamen 361005, China;

2 Department of Neurology, the Affiliated Hospital of Hangzhou Normal University, Hangzhou 310015, China;

3 Magnetic Resonance Center, Zhongshan Hospital, Medical College of Xiamen University, Xiamen 361004, China;

4 Departments of Respiratory, Zhongshan Hospital, Medical College of Xiamen University, 361004, Xiamen, China.

5 Department of Brain Protection and Plasticity, Institute of Basic Medical Sciences, Beijing 100850, China

#, authors with equal contributions

## Corresponding author:

Jiaying Zhang, PhD

Department of Physiology and Neurobiology

Medical College of Xiamen University

Xiamen, 361005, China

Tel: +86-0592-2188-421

Email: zhangjiaying@xmu.edu.cn

**Keywords:** Brain, chronic obstructive pulmonary disease, grey matter, magnetic resonance images,

white matter

**Word count:** 2961

**ABSTRACT**

Objectives The irreversible airflow limitation characterized chronic obstructive pulmonary disease (COPD) causes a decrease in oxygen supply to brain. The present study was to investigate brain structural damage in COPD. Design Retrospective case-control study. COPD patients and healthy volunteers were recruited. The two groups were matched in age, gender, and educational background. Setting A hospital and a number of communities: they are all located in southern Fujian province, China. Participants 25 stabled patients and 25 controls were collected from December 2009 to May 2011. Primary and secondary outcome measures Using voxel-based morphometry and tract-based spatial statistics based on MRI to analyze grey matter density and white matter fractional anisotropy (FA), respectively, and a battery of neuropsychological tests were performed. Results COPD patients (vs. controls) showed decreased grey matter density in the limbic and paralimbic structures, including right gyrus rectus, left precentral gyrus, bilateral anterior and middle cingulate gyri, bilateral superior temporal gyri, bilateral anterior insula extending to Rolandic operculum, bilateral thalamus/pulvinars, and left caudate nucleus. COPD patients (vs. controls) had decreased FA values in the bilateral superior corona radiata, bilateral superior and inferior longitudinal fasciculus, bilateral optic radiation, bilateral lingual gyri, left parahippocampal gyrus, and fornix. Lower FA values in these regions were associated with increased radial diffusivity and no changes of longitudinal diffusivity. COPD patients had poor performances in the Mini Mental State Examination, figure memory, and visual reproduction. GM density in some of the above regions in COPD had positive correlations with arterial blood  $Po_2$  while negative correlations with disease duration, and also, had positive correlations with visual tasks. Conclusion We demonstrated that COPD exhibited loss of regional grey matter accompanied by impairment of white matter microstructural integrity, which was associated with disease severity and

1  
2  
3  
4 may underlie the pathophysiological and psychological changes of COPD.  
5  
6

7  
8 **Funding:** This work was supported by National Science Foundation of China (Project No. 31071041;  
9  
10 81171324), Bureau of Science and Technology of Hangzhou (20090833B10), and Health Bureau of  
11  
12 Zhejiang Province (2009A168).  
13

14  
15 **Competing interests:** None.  
16

17  
18 **Data Sharing:** We are pleased to share our original data with all researchers.  
19  
20

21  
22  
23 **SUMMARY**  
24

25  
26 1) Article Focus: Decreased oxygen supply to brain may cause neuronal damage in COPD. However,  
27  
28 the damage remains to be largely unknown.  
29  
30

31  
32  
33 2) Key Messages: We found that COPD extends to the brain, with the loss of regional cortical grey  
34  
35 matter accompanied by impairment in the white matter microstructural integrity. > Our findings would  
36  
37 be help for clinical therapy of COPD.  
38  
39

40  
41  
42 3) Strengths and Limitations: Multiple analyses were used based on MR images. The statistic power for  
43  
44 FA analysis was weak.  
45  
46  
47  
48  
49  
50  
51  
52  
53  
54  
55  
56  
57  
58  
59  
60

## INTRODUCTION

Chronic obstructive pulmonary disease (COPD) continues to be a major cause of morbidity and mortality. It is increasingly recognized that COPD extends beyond the lung.<sup>1</sup> The irreversible airflow limitation characterized COPD usually develops arterial oxygen desaturation, which could subsequently result in a decrease in oxygen transport to the brain. Hypoxia during COPD has been previously proved to induce cerebral perfusion decline<sup>2</sup> and metabolic changes.<sup>3-6</sup> Moreover, systematic inflammation<sup>1</sup> may also cause neuronal damage in the brain of COPD patients. In COPD patients, clinical symptoms such as neuropsychological deficits,<sup>7</sup> depression and anxiety,<sup>1</sup> and physical disability<sup>1</sup> have been well documented. Taken together, all these data suggest the presence of brain structural alteration. However, until now, it remains to be largely uninvestigated.

Voxel-based morphometry (VBM) and Tract-Based Spatial Statistics (TBSS)<sup>8</sup> based on magnetic resonance images (MRI) were adopted to measure grey matter (GM) density and white matter (WM) fibrous microstructure properties in tracts, respectively. VBM is an automatic quantitative volumetric technique over the whole brain using voxel by voxel analysis without prior specification of regions of

1  
2  
3  
4 interest for analysis and it does not rely on arbitrarily predefined structures. Recently, the preprocessing  
5  
6 steps of VBM have been improved with the Diffeomorphic Anatomical Registration Through  
7  
8 Exponentiated Lie algebra (DARTEL) registration method,<sup>9</sup> which can achieve more accurate  
9  
10 inter-subject registration of brain images. TBSS is a recently introduced method, which uses diffusion  
11  
12 tensor MR imaging (DTI) to measure differences in fractional anisotropy (FA) between groups. TBSS  
13  
14 increases the sensitivity and the interpretability of the results compared with voxel-based approaches  
15  
16 based purely on non-linear registration.<sup>8</sup> Moreover, diffusion tensor eigenvalues (longitudinal  
17  
18 diffusivity [the magnitude of diffusion along the principal diffusion direction,  $\lambda_1$ ] and radial diffusivity  
19  
20 [the magnitude of diffusion in the two orthogonal directions perpendicular to the principal diffusion  
21  
22 direction,  $\lambda_{23}$ ]) were also included in the analysis since they can help interpret FA changes in WM  
23  
24 tracts by providing information regarding likely alterations in the proportion of longitudinally vs.  
25  
26 obliquely aligned myelinated fibers. The VBM and TBSS methods have been extensively applied in  
27  
28 clinical researches, including the evaluation of morphological characteristics of high-altitude residents  
29  
30 in our previous study.<sup>10</sup>

31  
32  
33  
34  
35  
36  
37  
38  
39  
40  
41  
42  
43  
44  
45  
46  
47  
48  
49  
50  
51  
52  
53  
54  
55  
56  
57  
58  
59  
60

Dyspnea is the most common complaint and most disabling symptom in patients with COPD. Functional MRI studies on breathlessness, air hunger, and inspiratory loaded breathing have revealed that a large number of brain regions, including the frontal cortex, parietal cortex, temporal cortex, limbic cortex, cerebellar cortex, and brainstem, were activated by dyspnea.<sup>11</sup> These dyspnea-activated brain regions have been shown to be impaired in congenital central hypoventilation syndrome patients,<sup>12</sup> in obstructive sleep apnea patients,<sup>13</sup> and in high-altitude residents.<sup>10</sup> We therefore hypothesized that COPD patients would have similar cerebral impairment.

## METHODS

### Subjects

Twenty-five patients were collected from December 2009 to May 2011. All patients had undergone a period 30 to 45 days of in-hospital rehabilitation following an acute exacerbation of COPD. At the time of data collection, patients were in stable condition. Among these patients, 12 discharged patients were recruited during their rest at home and 13 patients were recruited when they were awaiting discharge from hospital. Patients were diagnosed at stage I (4%), stage II (32%), stage III (28%) and stage IV (36%) in Zhongshan hospital (Xiamen, China) according to the diagnostic criteria of Global Initiative for Chronic Obstructive Lung Disease (GOLD).<sup>14</sup> Twenty-five healthy volunteers, with comparable age, gender, and educational background, comprised the control group. All the subjects were free from a known history of cerebrovascular accident, heart failure, neurological disorders, OSA, coronary artery disease, diabetes, or other diseases known to affect cognition. Patients were provided with therapy including inhaled ipratropium bromide, bricanyl, ventoline, and budesonide. Demographic characteristics of the patients and healthy volunteers were listed in Table 1. Procedures were fully explained and all subjects were provided written informed consent before participating in the study. The experimental protocol was approved by the Research Ethics Review Board of Xiamen University.

### Physiological and neuropsychological tests

Physiological and neuropsychological tests and activities of daily living (ADL) (score range 14-56)<sup>15</sup> were conducted one day before MRI scan. Physiological tests include pulse rate and arterial blood pressure measures, arterial blood gas analysis, and pulmonary function measure. Blood samples were taken in the morning at 0700-0730 h. The neuropsychological tests include: (i) the Chinese version of

1  
2  
3  
4 the Mini Mental State Examination (MMSE) measured the general cognitive function. (ii) the visual  
5  
6 reproduction test, figure memory test, and digital span forward and backward tasks, which taken from  
7  
8 the Chinese revised version of Wechsler Memory Scale, were used to measure visual construction  
9  
10 ability, visuospatial memory, and short-term working memory, respectively <sup>16</sup>. All data were analyzed  
11  
12 using SPSS 19.0 (Chicago, IL, USA). Independent t test measures between-group differences.  
13  
14  
15  
16 Statistical significance was set at  $p < 0.05$ .

### 21 MRI data acquisition

22  
23 Images were acquired on a Siemens Trio Tim 3.0T (Erlangen, Germany) at MRI Research Center  
24  
25 (Zhongshan Hospital, Xiamen, China). A 3D structural MRI was acquired from each subject using a  
26  
27 T1-weighted MPRAGE sequence (TR/TE = 1900 ms/2.48 ms, FOV =  $25 \times 25 \text{ cm}^2$ , NEX = 1, matrix =  
28  
29  $512 \times 256$ , slice thickness = 1.0 mm). Conventional 2D T1 and T2 images were also acquired and  
30  
31 examined for any incidental findings. A DTI pulse sequence with single shot diffusion-weighted echo  
32  
33 planar imaging (TR/TE = 3600/95 ms, FOV= $24 \times 24 \text{ cm}^2$ , NEX = 2, matrix =  $128 \times 128$ , slice  
34  
35 thickness = 4.5 mm) was applied sequentially in 30 non-collinear directions (b-value =  $1000 \text{ s/mm}^2$ )  
36  
37 with one scan without diffusion weighting (b =  $0 \text{ s/mm}^2$ ). The following data analyses were conducted  
38  
39 by two researchers who were blind to the status of subjects.  
40  
41  
42  
43  
44  
45  
46  
47  
48

### 49 VBM analysis of 3D T1 images

50  
51 The 3D T1 images were used for GM analysis using VBM8 toolbox implemented in SPM8 (Wellcome  
52  
53 Department of Imaging Neuroscience, University College London, London, UK). The following  
54  
55 processing steps were carried out: (i) the images were inspected and set at the anterior commissure.  
56  
57  
58  
59  
60



1  
2  
3  
4 Each reorientated image was segmented into GM, WM and CSF in native space and procrustes aligned  
5  
6 GM images were generated by a rigid transformation. (ii) the DARTEL was used to create  
7  
8 study-specific template by the aligned images from all the patients and controls to improve  
9  
10 inter-subject registration of structural images.<sup>9</sup> The procedure implicated in six iterations, which began  
11  
12 with the averaging of aligned data to generate an original template. Then, the first iteration of the  
13  
14 registration was done on each subject and a new template was created. After this, the second iteration  
15  
16 began. When six iterations were finished, the template was generated, which was the average of the  
17  
18 DARTEL registered data. During iterations, all images were warped to the template yielding a series of  
19  
20 flow fields that parameterized deformations. (iii) the normalized images were transformed into MNI  
21  
22 space. These GM images were then smoothed using a Gaussian kernel of 8 mm full-width at  
23  
24 half-maximum. Independent t-tests were performed to examine between-group differences. The  
25  
26 statistical parametric map was generated with threshold at  $t > 3.7734$ ,  $p < 0.01$  (FDR correction with  
27  
28 [gender](#), age, education, and total intracranial volume as covariates).  
29  
30  
31  
32  
33  
34  
35

36 To analyze the correlation of GM image value with cognitive or physiological measurement, the  
37  
38 following steps were first done: (1) Regions-of-interests were created for clusters showing differences  
39  
40 between groups; (2) using these Regions-of-interests masks, the GM values were extracted from each  
41  
42 individual's normalized and smoothed GM maps. Then the correlations were analyzed using SPSS.  
43  
44  
45  
46 Statistical significance was set at  $p < 0.05$ .  
47  
48  
49  
50

### 51 **TBSS analysis of DTI**

52 DCM2MII was used to convert diffusion tensor images from the proprietary scanner format to the  
53  
54 NIFTI format. Then images were processed using FSL 4.1.5 software package  
55  
56  
57  
58  
59  
60

1  
2  
3  
4 (http://www.fmrib.ox.ac.uk/fsl). Images were realigned to the b-value (b0) image by affine  
5  
6 transformations using FMRIB's diffusion toolbox (FDT)<sup>17</sup> to minimize distortions and reduce head  
7  
8 motion artifacts. In order to remove non-brain tissue components and background noise, brain mask  
9  
10 was created from the first b0 image, and then applied in the DTI to extract brain voxels using Brain  
11  
12 Extraction Tool (BET). After these processes, using DTIFit within the FDT, images were calculated to  
13  
14 get the FA,  $\lambda_1$ , and  $\lambda_{23}$  maps. The whole brain voxel-wise statistic analysis of FA images was  
15  
16 performed using TBSS in FSL.<sup>7</sup> TBSS processing includes the following steps: (i) align the FA images  
17  
18 of all subjects to a template which was arbitrarily selected from those FA images by nonlinear  
19  
20 registrations; (ii) transform all the aligned FA images into  $1 \times 1 \times 1 \text{ mm}^3$  MNI152 space by affine  
21  
22 registrations to remove the effect of cross-subject spatial variability that remains after the non-linear  
23  
24 registration; (iii) create the mean FA image and filter to retain only the center of the WM tracts, with  
25  
26 the threshold  $FA \geq 0.20$ , and successfully exclude voxels, which consisted of GM or CSF in the  
27  
28 majority of subjects, so as to create the mean FA skeleton. (iv) project individual subjects' FAs onto  
29  
30 mean FA skeleton. (v) following these steps, data were fed into voxel-wise cross-subject statistical  
31  
32 analyses. In all cases, the null distribution was built up over 5000 permutations, with significance  
33  
34 analyzed using independent t-tests at  $p < 0.05$  levels, uncorrected for multiple comparisons. We  
35  
36 determined the anatomic localization of each cluster by means of the FSL atlas tool, which incorporates  
37  
38 several anatomic templates, including the Harvard-Oxford Cortical Structural Atlas, Harvard-Oxford  
39  
40 Subcortical Structural Atlas, Talairach Daemon Labels, and MNI Structural Atlas.  
41  
42  
43  
44  
45  
46  
47  
48  
49  
50

51 Within the cluster of changed FA, mean  $\lambda_1$  and  $\lambda_{23}$  values were extracted from each individual's  $\lambda_1$   
52  
53 and  $\lambda_{23}$  maps. Values were analyzed using SPSS. ANOVA statistic to identify the group differences  
54  
55 for these distinct brain locations. Statistical significance was set at  $p < 0.05$ .  
56  
57  
58  
59  
60

## RESULTS

### *Physiological and behavioral findings (Table 2)*

Compared with the controls, Independent t test showed that COPD patients had significant decreases in arterial blood  $SaO_2$  and  $PO_2$ , and increases in arterial blood  $Pco_2$  and heart rate. COPD patients had significant lower one second over forced vital capacity (FVC), forced expiratory volume (FEV), and FEV1/FVC values and higher respiratory rate. COPD patients had significant lower scores in ADL, MMSE test, visual reproduction, and figure memory.

### **GM density**

No subject from either group showed visible abnormalities on T1-weighted structural images. VBM analysis showed that COPD patients had decreased GM densities compared with healthy controls in the right gyrus rectus, left precentral gyrus, bilateral anterior and middle cingulate gyri, bilateral superior temporal gyri, bilateral anterior insula extending to Rolandic operculum (base of the pre- and post-central gyri), bilateral thalamus/pulvinars, and left caudate nucleus (cluster size > 100 voxels) (Fig. 1-4, Table 3).

### **FA, longitudinal diffusivity, and radial diffusivity in relation to COPD**

Whole brain voxel-wise statistic analysis showed COPD patients had significantly lower FA in a broad range of brain regions compared with controls (Fig. 5, Table 4). The significantly affected regions (clusters size > 40 voxels) included the superior corona radiata (corresponding to bilateral precuneus and bilateral superior parietal lobules), superior longitudinal fasciculus (bilateral supramarginal gyri),

1  
2  
3 inferior longitudinal fasciculus (left superior temporal gyrus, right middle temporal gyrus, and fusiform  
4  
5  
6 gyrus), bilateral optic radiation, bilateral lingual gyri, left parahippocampal gyrus, and fornix.  
7

8  
9 Lower FA values in these regions were associated with increased radial diffusivity and no changes of  
10  
11 longitudinal diffusivity in COPD patients vs. controls (Table 4).  
12

### 13 14 15 16 **Correlations between MRI measurement and disease severity** 17

18  
19 The correlations were listed in Table 5. In COPD patients, partial correlation (controlling for disease  
20  
21 duration, FEV1/FVC, age, education, and gender) revealed GM density in the bilateral anterior  
22  
23 cingulate cortex, left superior temporal cortex, bilateral insula/superior temporal/Rolandic Operulum,  
24  
25 bilateral thalamus/Pulvinar, and left caudate nucleus had positive correlations with arterial blood Po<sub>2</sub>.  
26  
27  
28 Partial correlation (controlling for Po<sub>2</sub>, FEV1/FVC, age, education, and gender) revealed GM density in  
29  
30 the bilateral anterior cingulate cortex, right insula/superior temporal/Rolandic Operulum, and right  
31  
32 thalamus/Pulvinar had negative correlations with disease duration. Partial correlation (controlling for  
33  
34 age, education, and gender) analysis showed that the GM density in the left superior temporal lobes and  
35  
36  
37 left insula/superior temporal/Rolandic Operculum in COPD patients was significantly correlated with  
38  
39 figure memory score and the GM density in left precentral gyrus and left thalamus/Pulvinar in COPD  
40  
41  
42 patients was significantly correlated with visual reproduction.  
43  
44  
45  
46  
47  
48

### 49 **DISCUSSION** 50

51  
52 Our present study revealed that COPD patients had decreased regional GM density confined to the  
53  
54 limbic and paralimbic structures. GM density in impaired regions in COPD patients had significant  
55  
56 positive correlation with arterial blood Po<sub>2</sub> and negative correlation with disease duration. The  
57  
58  
59  
60

1  
2  
3  
4 decreased WM FA value with increased radial diffusivity value was detected mainly in the visual  
5  
6 cortex of occipital lobe, the posterior parietal lobe as well as the temporal lobe. Decreased FA was  
7  
8 associated with compromised myelin structure, changes in axonal morphologic structure, and altered  
9  
10 interaxonal spacing of fiber bundles.<sup>18</sup> Radial diffusivity measures motion of water molecules  
11  
12 perpendicular to fibers and increase of radial diffusivity is interpreted as abnormalities in myelinated  
13  
14 membranes.<sup>19</sup> Consequently, decreased FA and increased radial diffusivity in COPD indicated the  
15  
16 impairment of WM microstructural integrity.  
17  
18  
19

20  
21 Previously, Borson et al.<sup>6</sup> only measured the volume of hippocampus in COPD patients using  
22  
23 region-of-interest analysis and did not find significant change as our measured using VBM. The  
24  
25 impaired brain regions in COPD have also been found in other chronic hypoxic diseases. For example,  
26  
27 decrease of GM volume/concentration in the gyrus rectus, precentral gyrus, anterior cingulate cortex,  
28  
29 multiple sites within the temporal lobes, insular cortex, thalamus, and caudate nucleus were detected in  
30  
31 patients with obstructive sleep apnea.<sup>13</sup> Impairments of WM microstructure in the temporal lobe,  
32  
33 parietal lobe, fornix, and corona radiata were found in patients with congenital central hypoventilation  
34  
35 syndrome.<sup>12</sup> In our previous study, the decrease of GM volume in the anterior insula, anterior cingulate  
36  
37 cortex, and precentral cortex were found on high-altitude residents.<sup>10</sup>  
38  
39  
40  
41  
42  
43

44 GM density in impaired regions in COPD patients had strongly positive correlation with the arterial  
45  
46 blood Po<sub>2</sub>, which suggested the impairment in GM may result from low blood oxygen. Moreover, the  
47  
48 GM density in some impaired regions showed negative correlations with disease duration, suggesting  
49  
50 the more GMs were lost with low oxygen persists. It is already known that hypoxia can induce  
51  
52 metabolic decreases<sup>3-5</sup> and cerebral perfusion decline<sup>2</sup> in COPD. In addition, COPD patients often  
53  
54 suffer from systemic inflammation, which can exacerbate neuronal injury.<sup>1</sup> A greater proportion of  
55  
56  
57  
58  
59  
60

1  
2  
3 regions showing GM loss located in limbic/paralimbic cortex in COPD patients may be due to that  
4  
5 those phylogenetically older regions of the brain showed sharper vascular responses to hypoxia than  
6  
7 evolutionary younger regions.<sup>20</sup>  
8  
9

10  
11 Morphological impairments in anterior insula and anterior cingulate cortex could play a role in  
12  
13 respiratory and cardiovascular responses to dyspnea, because a larger cortical network including these  
14  
15 regions underlie the perception of dyspnea<sup>11</sup> and play an important role in regulating the cardiovascular  
16  
17 system.<sup>21</sup> The impaired GM in posterior thalamus may clarify the enhanced breathing movements in  
18  
19 COPD patients, because it has been proved to be implicated in suppressing the ventilatory response to  
20  
21 hypoxia.<sup>22</sup> Hippocampus has been proved to control arterial pressure and heart rate.<sup>23</sup> Therefore,  
22  
23 decreased GM or impaired connect fibers, such as fornix, in these areas may elucidate cardiovascular  
24  
25 disturbances in COPD patients.<sup>1</sup>  
26  
27  
28  
29  
30

31 In the present study, COPD patients had poorer performance in MMSE, visuospatial memory, and  
32  
33 visual construction task. These results were consistent with that found in previous studies in COPD  
34  
35 patients.<sup>7</sup> In line with the present findings in COPD, we previously found that long-time living at mild  
36  
37 high-altitude hypoxic environment impaired cognitive performances only confined to visual  
38  
39 reproduction and short-time complex figure memory.<sup>24</sup> In our present study, the decreases of GM  
40  
41 density in frontal precentral cortex, insula/superior temporal cortex/Rolandic Operculum, and  
42  
43 thalamus/pulvinar may be responsible for the deficit in visual-related tasks since the GM density in  
44  
45 these areas showed a significantly positive correlation with figure memory or visual reproduction score.  
46  
47  
48  
49 The following previous data may support our findings: (i) Recent research has identified the inferior  
50  
51 frontal cortex served as a source of top-down modulation underlying attention to visual features.<sup>25</sup> (ii)  
52  
53 Studies on patients using fMRI and PET demonstrated Rolandic operculum as one of the visual  
54  
55  
56  
57  
58  
59  
60

1  
2  
3  
4 structures.<sup>26</sup> (iii) The pulvinar region of the thalamus is known to project to posterior parietal lobe and  
5  
6 inferior temporal lobe. The pulvinar has been implicated in various visual functions in lesion studies.<sup>27</sup>  
7  
8 Declines in memory and executive function make contributions to declines in ADL.<sup>28</sup> Visual  
9  
10 construction task reflects executive function. Therefore, the decreases of GM density in the above  
11  
12 regions that relate to visual construction may also be responsible for ADL deficits.  
13  
14

15  
16 Our present study found the impairments of WM limited to the pathways of visual processing,  
17  
18 including optic radiation, posterior parietal lobe (superior parietal lobule, supramarginal gyrus, and  
19  
20 precuneus), and the inferior temporal fusiform and lingual gyri. Visual information enters the primary  
21  
22 visual cortex via optic radiation to the visual cortex. Cortical areas along the posterior parietal ‘dorsal  
23  
24 stream’ are primarily concerned with spatial localization and directing attention, while cortical areas  
25  
26 along the inferior temporal ‘ventral stream’ are mainly concerned with the recognition and  
27  
28 identification of visual stimuli.<sup>29</sup> COPD also showed impaired WM in middle temporal gyrus. Middle  
29  
30 temporal cortex is important for the long-term buildup of perceptual memory for ambiguous motion  
31  
32 stimuli.<sup>30</sup> Based on the above data, our findings in WM may also clarify the mechanisms underling the  
33  
34 deficit in visual-related tasks. In addition, impaired WM in input and output fibers of hippocampus  
35  
36 (fornix) may be related to the deficit in MMSE. Previous study on patients with Alzheimer's disease  
37  
38 found the volumes of hippocampus were significantly reduced and the volumes of the left hippocampus  
39  
40 correlated significantly with the MMSE score.<sup>31</sup> The limitation of our study is the weak statistical  
41  
42 power of FA value analysis, because the results obtained in the TBSS analysis could not survive  
43  
44 multiple comparison correction.  
45  
46  
47  
48  
49  
50  
51  
52  
53  
54  
55

## 56 **Conclusions**

57  
58  
59  
60

1  
2  
3  
4 In summary, we first demonstrated that COPD extended beyond the lung to the brain, with the decrease  
5  
6 of regional GM density accompanied by impairment in the WM microstructural integrity. Our findings  
7  
8 suggest significant participation of these structures in responding to hypoxic challenges, which include  
9  
10 cardiovascular and air-hunger components. The brain structural changes may also underlie the  
11  
12 psychological and mood changes of COPD.  
13  
14

### 15 16 17 18 19 **Authors' contributions**

20  
21 *Haiyan Zhang:* contributed to the study design, take responsibility for the integrity of the data, the  
22  
23 accuracy of the data analysis.  
24

25  
26 *Xiaochuan Wang:* contributed to the study design, collection, analysis, and interpretation of data, and  
27  
28 critical review.  
29

30  
31 *Jianzhong Lin:* contributed to the collection, analysis, and interpretation of data.  
32

33  
34 *Yingchun Sun:* contributed to the collection, analysis, and interpretation of data.  
35

36  
37 *Yongxia Huang:* contributed to the collection, analysis, and interpretation of data.  
38

39  
40 *Tianhe Yang:* contributed to the collection, analysis, and interpretation of data.  
41

42  
43 *Shili Zheng:* contributed to the collection, analysis, and interpretation of data.  
44

45  
46 *Ming Fan:* contributed to the study design, drafting, critical review, and final approval of the  
47  
48 manuscript.  
49

50  
51 *Jiaxing Zhang:* contributed to conception and design, interpretation of data, drafting the article, and  
52  
53 final approval of the manuscript.  
54  
55  
56  
57  
58  
59  
60



**Table 1** Demographic characteristics of the patients with COPD and healthy volunteers

|                                   | <b>COPD patients</b>     | <b>Controls</b>           | <b>p</b> |
|-----------------------------------|--------------------------|---------------------------|----------|
| Number of subjects                | 25                       | 25                        |          |
| Gender (female) (%)               | 16                       | 16                        |          |
| Age (years) (mean $\pm$ SD)       | 69.2 $\pm$ 8.1 (58 - 84) | 67.96 $\pm$ 8.0 (57 - 86) | 0.59     |
| Education (years) (mean $\pm$ SD) | 6.7 $\pm$ 3.9            | 7.5 $\pm$ 5.0             | 0.53     |
| Family history of COPD (%)        | 4                        | -                         |          |
| Disease duration (years)          | 7.0 $\pm$ 5.7            | -                         |          |
| Actual smokers (%)                | 44                       | 40                        | 0.86     |

**Table 2** Physiological and psychological characteristics

|                                | COPD patients | Controls     | <i>P</i> |
|--------------------------------|---------------|--------------|----------|
| BMI (kg/m <sup>2</sup> )       | 20.8 ± 3.9    | 22.6 ± 2.6   | 0.081    |
| ADL                            | 20.12 ± 6.5   | 14.6 ± 1.52  | <0.001   |
| Heart rate                     | 92.4 ± 16.2   | 70.9 ± 8.94  | <0.001   |
| Blood pressure (mmHg)          |               |              |          |
| systolic pressure              | 136.1 ± 19.1  | 136.5 ± 18.0 | 0.940    |
| diastolic pressure             | 81.8 ± 10.7   | 77.5 ± 14.5  | 0.307    |
| Hematological measurements     |               |              |          |
| Sao <sub>2</sub> (%)           | 94.0 ± 4.2    | 97.0 ± 1.3   | 0.003    |
| Po <sub>2</sub> (mmHg)         | 79.9 ± 23.3   | 98.5 ± 11.3  | 0.006    |
| Pco <sub>2</sub> (mmHg)        | 48.1 ± 6.0    | 39.8 ± 3.0   | <0.001   |
| pH                             | 7.37 ± 0.06   | 7.36 ± 0.01  | 0.731    |
| Pulmonary Function testing     |               |              |          |
| Respiratory rate (breaths/min) | 23.5 ± 6.0    | 16.9 ± 5.5   | 0.003    |
| FVC (% predicted)              | 66.6 ± 17.2   | 96.1 ± 14.7  | <0.001   |
| FEV1 (% predicted)             | 43.4 ± 16.4   | 97.5 ± 16.9  | <0.001   |
| FEV1/ FVC (%)                  | 50.31 ± 10.7  | 80.0 ± 8.32  | <0.001   |

| Cognitive tests     |            |            |       |
|---------------------|------------|------------|-------|
| MMSE                | 23.3 ± 3.4 | 25.8 ± 2.1 | 0.021 |
| Digit Span          |            |            |       |
| Forward task        | 7.0 ± 1.6  | 7.7 ± 1.4  | 0.125 |
| Backward task       | 4.1 ± 1.9  | 4.3 ± 1.5  | 0.612 |
| Visual reproduction | 8.2 ± 3.4  | 10.3 ± 3.0 | 0.031 |
| Figure memory       | 10.5 ± 3.0 | 12.4 ± 1.9 | 0.010 |

ADL, activities of daily living; BMI, body mass index; FEV1, forced expired volume in one second; FVC, forced vital capacity;

MMSE, Mini Mental State Examination. Data are mean ± SD.

**Table 3** Regional information of decreased grey matter density (cluster size > 100 voxels) in COPD patients compared with healthy controls

| Area                                 | Volume<br>(mm <sup>3</sup> ) | Brodmann<br>areas | MNI coordinate |     |     | t-score<br>(peak) |
|--------------------------------------|------------------------------|-------------------|----------------|-----|-----|-------------------|
|                                      |                              |                   | x              | y   | z   |                   |
| Rectus_R                             | 118                          | 11                | 9              | 39  | -20 | 4.31              |
| Precentral_L                         | 100                          | 6                 | -51            | -5  | 33  | 4.95              |
| Cingulum_Ant_R                       | 485                          | 32                | 8              | 38  | 17  | 5.88              |
| Cingulum_Ant_L                       | 212                          | 32                | -8             | 38  | 18  | 4.49              |
| Cingulum_Mid_R                       | 157                          | 24                | 6              | -9  | 42  | 4.87              |
| Cingulum_Mid_L                       | 136                          | 24                | -6             | -9  | 41  | 4.91              |
| Temporal_Sup_L                       | 280                          | 22/42             | -60            | -33 | 3   | 4.99              |
| Temporal_Sup/ Rolandic_Oper_L        | 837                          | 22                | -57            | -14 | 10  | 4.91              |
| Insula/Temporal_Sup/ Rolandic_Oper_R | 2821                         | 13/22/47          | 44             | 11  | -5  | 5.15              |
| Insula/Temporal_Sup/ Rolandic_Oper_L | 1551                         | 13/22/47          | -33            | 12  | -15 | 4.48              |
| Thalamus/Pulvinar_L                  | 1270                         |                   | -12            | -30 | 3   | 6.46              |
| Thalamus/Pulvinar_R                  | 2210                         |                   | 12             | -26 | 8   | 5.29              |
| Caudate_L                            | 212                          |                   | -9             | 14  | 14  | 4.19              |

**Table 4** Main regions showing FA,  $\lambda_1$ ,  $\lambda_{23}$  values in COPD patients compared with healthy controls

| MNI (peak) |     |     | Voxels<br>(mm <sup>3</sup> ) | White matter<br>tract | Corresponding cortical area    | FA value     |              | $\lambda_1$ ( $\times 10^3$ mm <sup>2</sup> /s) |               | $\lambda_{23}$ ( $\times 10^3$ mm <sup>2</sup> /s) |               |
|------------|-----|-----|------------------------------|-----------------------|--------------------------------|--------------|--------------|-------------------------------------------------|---------------|----------------------------------------------------|---------------|
| x          | y   | z   |                              |                       |                                | COPD         | Control      | COPD                                            | Control       | COPD                                               | Control       |
| 1          | 10  | 16  | 240                          | Fornix                | Fornix                         | 0.248(0.067) | 0.289(0.073) | 2.586(0.314)                                    | 2.406(0.0321) | 1.809(0.295)                                       | 1.577(0.262)* |
| -26        | -69 | 1   | 191                          | Lingual gyrus         | Left lingual gyrus             | 0.259(0.042) | 0.283(0.046) | 1.450(0.240)                                    | 1.370(0.224)  | 0.992(0.185)                                       | 0.896(0.168)* |
| 27         | -53 | 3   | 147                          | Lingual gyrus         | Right lingual gyrus            | 0.265(0.065) | 0.290(0.056) | 1.381(0.239)                                    | 1.346(0.227)  | 0.955(0.242)                                       | 0.891(0.215)* |
| -23        | -19 | -24 | 77                           | Parahippocampus       | Left parahippocampus           | 0.268(0.042) | 0.319(0.046) | 1.234(0.057)                                    | 1.189(0.052)  | 0.869(0.148)                                       | 0.771(0.125)* |
| 38         | -24 | -24 | 77                           | fusiform gyrus        | Right fusiform gyrus           | 0.231(0.037) | 0.248(0.046) | 1.053(0.063)                                    | 1.094(0.073)  | 0.774(0.030)                                       | 0.723(0.032)* |
| -10        | -91 | 17  | 204                          | Optic radiation       | Left occipital cortex          | 0.234(0.043) | 0.277(0.041) | 1.037(0.038)                                    | 1.020(0.031)  | 0.752(0.063)                                       | 0.693(0.051)* |
| 25         | -86 | -5  | 200                          | Optic radiation       | Right occipital cortex         | 0.369(0.099) | 0.409(0.122) | 1.171(0.014)                                    | 1.177(0.171)  | 0.649(0.057)                                       | 0.601(0.071)* |
| -9         | -72 | 45  | 94                           | SCR                   | Left precuneus                 | 0.283(0.053) | 0.317(0.056) | 1.099(0.032)                                    | 1.069(0.041)  | 0.726(0.075)                                       | 0.665(0.065)* |
| 9          | -66 | 37  | 57                           | SCR                   | Right precuneus                | 0.251(0.030) | 0.280(0.044) | 1.044(0.032)                                    | 1.018(0.023)  | 0.868(0.073)                                       | 0.731(0.084)* |
| -15        | -51 | 62  | 57                           | SCR                   | Left superior parietal lobule  | 0.267(0.043) | 0.294(0.043) | 1.130(0.051)                                    | 1.082(0.025)  | 0.724(0.039)                                       | 0.671(0.045)* |
| 16         | -45 | 64  | 66                           | SCR                   | Right superior parietal lobule | 0.251(0.043) | 0.294(0.051) | 1.176(0.117)                                    | 1.107(0.094)  | 0.805(0.056)                                       | 0.762(0.056)* |
| -45        | -53 | 31  | 44                           | SLF                   | Left supramarginal gyrus       | 0.221(0.027) | 0.239(0.026) | 1.088(0.020)                                    | 1.076(0.040)  | 0.935(0.090)                                       | 0.873(0.071)* |
| 37         | -68 | 21  | 63                           | SLF                   | Right supramarginal gyrus      | 0.220(0.025) | 0.237(0.025) | 1.116(0.039)                                    | 1.090(0.052)  | 0.773(0.076)                                       | 0.715(0.007)* |
| -48        | 0   | -16 | 43                           | ILF                   | Left superior temporal gyrus   | 0.244(0.013) | 0.270(0.021) | 1.060(0.030)                                    | 0.984(0.015)  | 0.758(0.025)                                       | 0.714(0.037)* |
| 53         | -46 | -6  | 41                           | ILF                   | Right middle temporal gyrus    | 0.206(0.016) | 0.241(0.024) | 1.025(0.016)                                    | 1.006(0.021)  | 1.605(0.167)                                       | 1.340(0.139)* |

ILF, inferior longitudinal fasciculus; SCR, superior corona radiata; SLF, superior longitudinal fasciculus. Data are presented as means (SD). \*p<0.05.

**Table 5** Correlations of grey matter density in impaired regions with Po<sub>2</sub>, disease duration, and cognitive performances in patients with COPD

| Area                                   | Po <sub>2</sub>  | Disease duration  | Cognitive performances |                     |
|----------------------------------------|------------------|-------------------|------------------------|---------------------|
|                                        | (patients)       | (patients)        | (patients + controls)  |                     |
|                                        |                  |                   | figure memory          | visual reproduction |
| Precentral_L                           |                  |                   |                        | r=0.306, p=0.028    |
| 2Cingulum_Ant_R                        | r=0.530, p=0.021 | r=-0.471, p=0.038 |                        |                     |
| 1Cingulum_Ant_L                        | r=0.744, p=0.001 | r=-0.476, p=0.036 |                        |                     |
| Cingulum_Mid_R                         |                  |                   |                        |                     |
| Cingulum_Mid_L                         |                  |                   |                        |                     |
| 11Temporal_Sup_L                       | r=0.713, p=0.001 |                   |                        | r=0.511, p=0.001    |
| Temporal_Sup/ Rolandic_Oper _L         |                  |                   |                        |                     |
| 6Insula/Temporal_Sup/ Rolandic_Oper _R | r=0.615, p=0.007 |                   |                        |                     |
| 7Insula/Temporal_Sup/Rolandic_Oper _L  | r=0.656, p=0.004 |                   |                        | r=0.498, p=0.001    |
| 9Thalamus/Pulvinar_L                   | r=0.487, p=0.033 | r=-0.474, p=0.037 |                        | r=0.284, p=0.044    |
| 8Thalamus/Pulvinar_R                   | r=0.502, p=0.028 | r=-0.517, p=0.024 |                        |                     |
| 5Caudate_L                             | r=0.550, p=0.017 |                   |                        |                     |

**REFERENCES**

1. Barnes PJ. Chronic obstructive pulmonary disease: effects beyond the lungs. *PLoS Med* 2010; 7:e1000220.
2. Ortapamuk H, Naldoken S. Brain perfusion abnormalities in chronic obstructive pulmonary disease: comparison with cognitive impairment. *Ann Nucl Med* 2006; 20:99-106.
3. Shim TS, Lee JH, Kim SY, *et al.* Cerebral metabolic abnormalities in COPD patients detected by localized proton magnetic resonance spectroscopy. *Chest* 2001; 120:1506-13.
4. Sicard KM, Duong TQ. Effects of hypoxia, hyperoxia, and hypercapnia on baseline and stimulus-evoked BOLD, CBF, and CMRO2 in spontaneously breathing animals. *Neuroimage* 2005; 25:850-8.
5. Sinha S, Kumar V, Jagannathan NR, *et al.* Proton magnetic resonance spectroscopy of brain to study the cerebral metabolic abnormalities in COPD patients: a case control study in north India. *Indian J Chest Dis Allied Sci* 2009; 51:15-9.

- 1  
2  
3  
4 6. Borson S, Scanlan JM, Friedman S, *et al.* Modeling the impact of COPD on the brain.  
5  
6 *International Journal of Chronic Obstructive Pulmonary Disease* 2008; 3: 429-34.  
7
- 8  
9 7. Dodd JW, Getov SV, Jones PW. Cognitive function in COPD. *Eur Respir J* 2010; 35:913-22.  
10
- 11 8. Smith SM, Jenkinson M, Johansen-Berg H, *et al.* Tract-based spatial statistics: voxelwise analysis  
12  
13 of multi-subject diffusion data. *Neuroimage* 2006; 31:1487-505.  
14
- 15 9. Ashburner J. A fast diffeomorphic image registration algorithm. *Neuroimage* 2007; 38:95-113.  
16
- 17 10. Zhang J, Yan X, Shi J, *et al.* Structural modifications of the brain in acclimatization to high-altitude.  
18  
19 *PLoS One* 2010; 5:e11449.  
20
- 21 11. von Leupoldt A, Dahme B. Cortical substrates for the perception of dyspnea. *Chest* 2005;  
22  
23 128:345-54.  
24
- 25 12. Kumar R, Macey PM, Woo MA, *et al.* Diffusion tensor imaging demonstrates brainstem and  
26  
27 cerebellar abnormalities in congenital central hypoventilation syndrome. *Pediatr Res* 2008;  
28  
29 64:275-80.  
30
- 31 13. Joo EY, Tae WS, Lee MJ, *et al.* Reduced brain gray matter concentration in patients with  
32  
33 obstructive sleep apnea syndrome. *Sleep* 2010; 33:235-41.  
34
- 35 14. Pauwels RA, Buist AS, Calverley PM, *et al.* Global strategy for the diagnosis, management, and  
36  
37 prevention of chronic obstructive pulmonary disease. NHLBI/WHO Global Initiative for  
38  
39 Chronic Obstructive Lung Disease (GOLD) Workshop summary. *Am J Respir Crit Care Med*  
40  
41 2001; 163:1256-76.  
42
- 43 15. Lawton MP, Brody EM. Assessment of older people: self-maintaining and instrumental activities  
44  
45 of daily living. *Gerontologist* 1969; 9:179-86.  
46
- 47 16. Gong YX. *Manual for the Wechsler Memory Scale-Revised*. Hunan Medical University. Changsha,  
48  
49  
50  
51  
52  
53  
54  
55  
56  
57  
58  
59  
60

Hunan, China. 1989.

17. Jenkinson M, Smith S. A global optimisation method for robust affine registration of brain images. *Med Image Anal* 2001; 5:143-56.
18. Beaulieu C. The basis of anisotropic water diffusion in the nervous system - a technical review. *NMR Biomed* 2002; 15:435-55.
19. Song SK, Sun SW, Ramsbottom MJ, *et al.* Demyelination revealed through MRI as increased radial (but unchanged axial) diffusion of water. *Neuroimage* 2002; 17:1429-36.
20. Binks AP, Cunningham VJ, Adams L, *et al.* Gray matter blood flow change is unevenly distributed during moderate isocapnic hypoxia in humans. *J Appl Physiol* 2008; 104:212-7.
21. Nagai M, Hoshida S, Kario K. The insular cortex and cardiovascular system: a new insight into the brain-heart axis. *J Am Soc Hypertens* 2010; 4:174-82.
22. Teppema LJ, Dahan A. The ventilatory response to hypoxia in mammals: mechanisms, measurement, and analysis. *Physiol Rev* 2010; 90:675-754.
23. Macefield VG, Gandevia SC, Henderson LA. Neural sites involved in the sustained increase in muscle sympathetic nerve activity induced by inspiratory capacity apnea: a fMRI study. *J Appl Physiol* 2006; 100:266-73.
24. Zhang J, Liu H, Yan X, *et al.* Minimal effects on human memory following long-term living at moderate altitude. *High Alt Med Biol* 2011; 12:37-43.
25. Zanto TP, Rubens MT, Bollinger J, *et al.* Top-down modulation of visual feature processing: the role of the inferior frontal junction. *Neuroimage* 2010; 53:736-45.
26. Fried I, Nenov VI, Ojemann SG, *et al.* Functional MR and PET imaging of rolandic and visual cortices for neurosurgical planning. *J Neurosurg* 1995; 83:854-61.



- 1  
2  
3  
4 27. Arend I, Machado L, Ward R, *et al*. The role of the human pulvinar in visual attention and action:  
5  
6 evidence from temporal-order judgment, saccade decision, and antisaccade tasks. *Prog Brain*  
7  
8 *Res* 2008; 171:475-83.
- 9  
10  
11 28. Tomaszewski Farias S, Cahn-Weiner DA, Harvey DJ, *et al*. Longitudinal changes in memory and  
12  
13 executive functioning are associated with longitudinal change in instrumental activities of  
14  
15 daily living in older adults. *Clin Neuropsychol* 2009; 23:446-61.
- 16  
17  
18 29. Itti L, Koch C. Computational modelling of visual attention. *Nat Rev Neurosci* 2001; 2:194-203
- 19  
20  
21 30. Brascamp JW, Kanai R, Walsh V, *et al*. Human middle temporal cortex, perceptual bias, and  
22  
23 perceptual memory for ambiguous three-dimensional motion. *J Neurosci* 2010; 30:760-6.
- 24  
25  
26 31. Laakso MP, Soininen H, Partanen K, *et al*. Volumes of hippocampus, amygdala and frontal lobes  
27  
28 in the MRI-based diagnosis of early Alzheimer's disease: correlation with memory functions. *J*  
29  
30 *Neural Transm Park Dis Dement Sect* 1995; 9:73-86.
- 31  
32  
33  
34  
35  
36  
37  
38  
39  
40  
41  
42  
43  
44  
45  
46  
47  
48  
49  
50  
51  
52  
53  
54  
55  
56  
57  
58  
59  
60

1  
2  
3  
4  
5  
6  
7  
8  
9  
10  
11  
12  
13  
14  
15  
16  
17  
18  
19  
20  
21  
22  
23  
24  
25  
26  
27  
28  
29  
30  
31  
32  
33  
34  
35  
36  
37  
38  
39  
40  
41  
42  
43  
44  
45  
46  
47  
48  
49  
50  
51  
52  
53  
54  
55  
56  
57  
58  
59  
60



Figure 1 A statistical parametric map for grey matter density reduced in COPD patients vs. healthy controls (pFDR<sub>corrected</sub> < 0.01) overlaid on the MNI template.



Figure 2 Grey matter density decrease in COPD patients vs. healthy controls. Three-dimensional slices depicting regions showing reduced grey matter in the right gyrus rectus, left precentral gyrus, left Rolandic operculum and superior temporal gyrus overlaid on a T1-weighted MRI anatomical image in the MNI template.



46  
47  
48  
49  
50  
51  
52  
53  
54  
55  
56  
57  
58  
59  
60

Figure 3 Grey matter density decrease in COPD patients vs. healthy controls. Three-dimensional slices depicting regions showing reduced grey matter in the bilateral anterior and middle cingulate gyri overlaid on a T1-weighted MRI anatomical image in the MNI template.





46  
47  
48  
49  
50  
51  
52  
53  
54  
55  
56  
57  
58  
59  
60

Figure 4 Grey matter density decrease in COPD patients vs. healthy controls. Three-dimensional slices depicting regions showing reduced grey matter in the bilateral insula, bilateral thalamus, and left caudate nucleus overlaid on a T1-weighted MRI anatomical image in the MNI template.

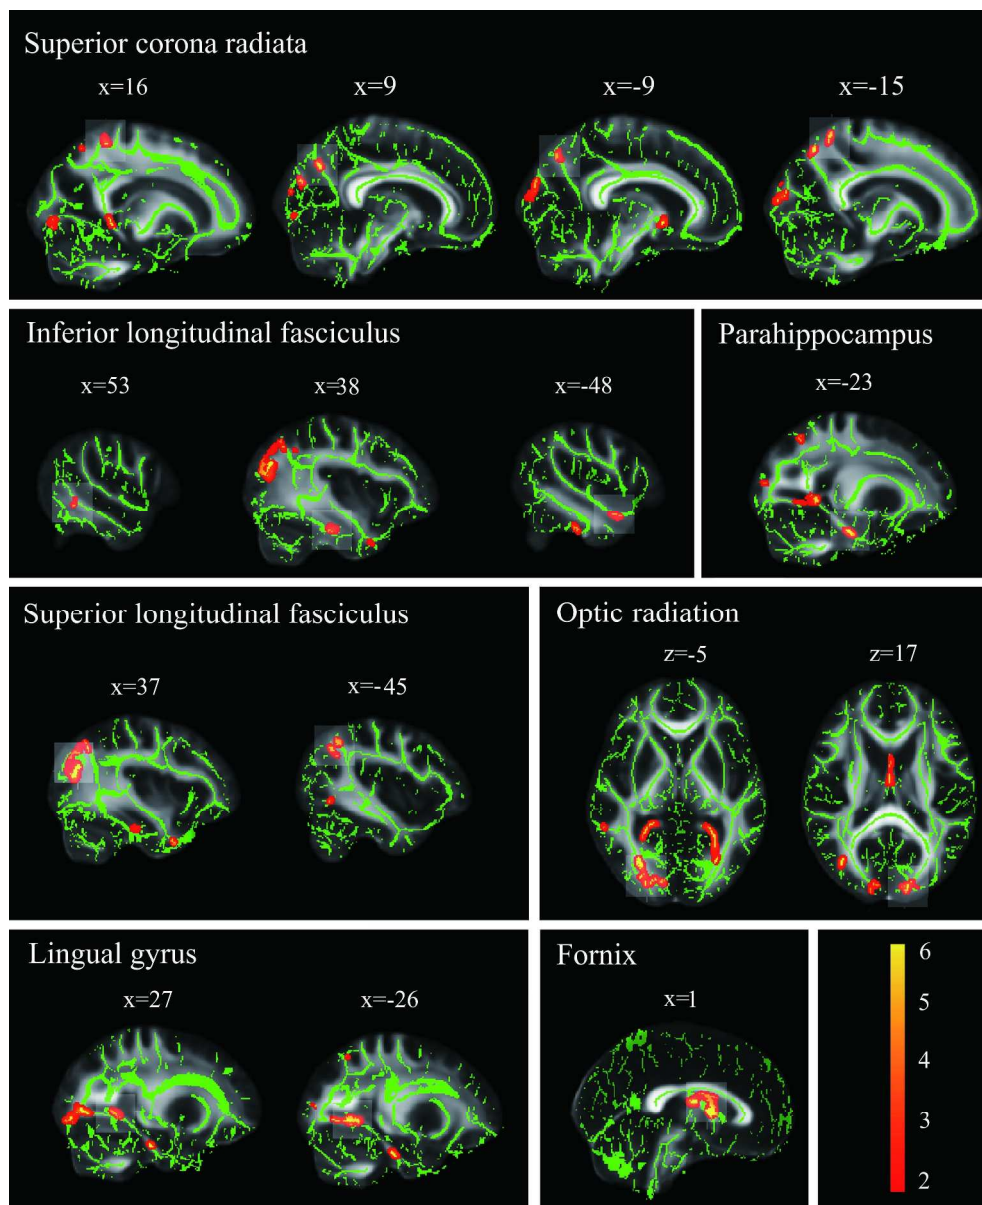

Figure 5 Statistical maps of group comparison of FA value on a voxel-wise basis (results of TBSS). The group's mean FA skeleton (green) was overlaid on the MNI template. The threshold of mean FA skeleton was set at 0.2. COPD patients show significantly lower FA value than healthy controls ( $p < 0.05$ ).

STROBE 2007 (v4) Statement—Checklist of items that should be included in reports of *case-control studies*

| Section/Topic                | Item # | Recommendation                                                                                                                                                                       | Reported on page # |
|------------------------------|--------|--------------------------------------------------------------------------------------------------------------------------------------------------------------------------------------|--------------------|
| Title and abstract           | 1      | (a) Indicate the study's design with a commonly used term in the title or the abstract                                                                                               | 1                  |
|                              |        | (b) Provide in the abstract an informative and balanced summary of what was done and what was found                                                                                  | 2                  |
| <b>Introduction</b>          |        |                                                                                                                                                                                      |                    |
| Background/rationale         | 2      | Explain the scientific background and rationale for the investigation being reported                                                                                                 | 4                  |
| Objectives                   | 3      | State specific objectives, including any prespecified hypotheses                                                                                                                     | 4 and 5            |
| <b>Methods</b>               |        |                                                                                                                                                                                      |                    |
| Study design                 | 4      | Present key elements of study design early in the paper                                                                                                                              | 5                  |
| Setting                      | 5      | Describe the setting, locations, and relevant dates, including periods of recruitment, exposure, follow-up, and data collection                                                      | 5                  |
| Participants                 | 6      | (a) Give the eligibility criteria, and the sources and methods of case ascertainment and control selection. Give the rationale for the choice of cases and controls                  | 5 and 6            |
|                              |        | (b) For matched studies, give matching criteria and the number of controls per case                                                                                                  | 5                  |
| Variables                    | 7      | Clearly define all outcomes, exposures, predictors, potential confounders, and effect modifiers. Give diagnostic criteria, if applicable                                             | 5                  |
| Data sources/<br>measurement | 8*     | For each variable of interest, give sources of data and details of methods of assessment (measurement). Describe comparability of assessment methods if there is more than one group | 6                  |
| Bias                         | 9      | Describe any efforts to address potential sources of bias                                                                                                                            |                    |
| Study size                   | 10     | Explain how the study size was arrived at                                                                                                                                            |                    |
| Quantitative variables       | 11     | Explain how quantitative variables were handled in the analyses. If applicable, describe which groupings were chosen and why                                                         |                    |
| Statistical methods          | 12     | (a) Describe all statistical methods, including those used to control for confounding                                                                                                | 6 - 8              |
|                              |        | (b) Describe any methods used to examine subgroups and interactions                                                                                                                  | 6 - 8              |
|                              |        | (c) Explain how missing data were addressed                                                                                                                                          |                    |
|                              |        | (d) If applicable, explain how matching of cases and controls was addressed                                                                                                          |                    |
|                              |        | (e) Describe any sensitivity analyses                                                                                                                                                | 6 - 8              |
| <b>Results</b>               |        |                                                                                                                                                                                      |                    |

|                          |     |                                                                                                                                                                                                                                                                                                                                                                                                               |          |
|--------------------------|-----|---------------------------------------------------------------------------------------------------------------------------------------------------------------------------------------------------------------------------------------------------------------------------------------------------------------------------------------------------------------------------------------------------------------|----------|
| Participants             | 13* | (a) Report numbers of individuals at each stage of study—eg numbers potentially eligible, examined for eligibility, confirmed eligible, included in the study, completing follow-up, and analysed<br>(b) Give reasons for non-participation at each stage<br>(c) Consider use of a flow diagram                                                                                                               | 5        |
| Descriptive data         | 14* | (a) Give characteristics of study participants (eg demographic, clinical, social) and information on exposures and potential confounders<br>(b) Indicate number of participants with missing data for each variable of interest                                                                                                                                                                               | 17       |
| Outcome data             | 15* | Report numbers in each exposure category, or summary measures of exposure                                                                                                                                                                                                                                                                                                                                     |          |
| Main results             | 16  | (a) Give unadjusted estimates and, if applicable, confounder-adjusted estimates and their precision (eg, 95% confidence interval). Make clear which confounders were adjusted for and why they were included<br>(b) Report category boundaries when continuous variables were categorized<br>(c) If relevant, consider translating estimates of relative risk into absolute risk for a meaningful time period | 9 and 10 |
| Other analyses           | 17  | Report other analyses done—eg analyses of subgroups and interactions, and sensitivity analyses                                                                                                                                                                                                                                                                                                                |          |
| <b>Discussion</b>        |     |                                                                                                                                                                                                                                                                                                                                                                                                               |          |
| Key results              | 18  | Summarise key results with reference to study objectives                                                                                                                                                                                                                                                                                                                                                      | 11       |
| Limitations              | 19  | Discuss limitations of the study, taking into account sources of potential bias or imprecision. Discuss both direction and magnitude of any potential bias                                                                                                                                                                                                                                                    |          |
| Interpretation           | 20  | Give a cautious overall interpretation of results considering objectives, limitations, multiplicity of analyses, results from similar studies, and other relevant evidence                                                                                                                                                                                                                                    | 11-15    |
| Generalisability         | 21  | Discuss the generalisability (external validity) of the study results                                                                                                                                                                                                                                                                                                                                         |          |
| <b>Other information</b> |     |                                                                                                                                                                                                                                                                                                                                                                                                               |          |
| Funding                  | 22  | Give the source of funding and the role of the funders for the present study and, if applicable, for the original study on which the present article is based                                                                                                                                                                                                                                                 | 3        |

\*Give information separately for cases and controls in case-control studies and, if applicable, for exposed and unexposed groups in cohort and cross-sectional studies.

**Note:** An Explanation and Elaboration article discusses each checklist item and gives methodological background and published examples of transparent reporting. The STROBE checklist is best used in conjunction with this article (freely available on the Web sites of PLoS Medicine at <http://www.plosmedicine.org/>, Annals of Internal Medicine at <http://www.annals.org/>, and Epidemiology at <http://www.epidem.com/>). Information on the STROBE Initiative is available at [www.strobe-statement.org](http://www.strobe-statement.org).





**Grey and white matter abnormalities in chronic obstructive pulmonary disease: a case-control study**

|                                 |                                                                                                                                                                                                                                                                                                                                                                                                                                                                                                                                                                                                                                                                                                                                                                                                                                                                                                                                                      |
|---------------------------------|------------------------------------------------------------------------------------------------------------------------------------------------------------------------------------------------------------------------------------------------------------------------------------------------------------------------------------------------------------------------------------------------------------------------------------------------------------------------------------------------------------------------------------------------------------------------------------------------------------------------------------------------------------------------------------------------------------------------------------------------------------------------------------------------------------------------------------------------------------------------------------------------------------------------------------------------------|
| Journal:                        | <i>BMJ Open</i>                                                                                                                                                                                                                                                                                                                                                                                                                                                                                                                                                                                                                                                                                                                                                                                                                                                                                                                                      |
| Manuscript ID:                  | bmjopen-2012-000844.R2                                                                                                                                                                                                                                                                                                                                                                                                                                                                                                                                                                                                                                                                                                                                                                                                                                                                                                                               |
| Article Type:                   | Research                                                                                                                                                                                                                                                                                                                                                                                                                                                                                                                                                                                                                                                                                                                                                                                                                                                                                                                                             |
| Date Submitted by the Author:   | 05-Mar-2012                                                                                                                                                                                                                                                                                                                                                                                                                                                                                                                                                                                                                                                                                                                                                                                                                                                                                                                                          |
| Complete List of Authors:       | zhang, haiyan; Department of Physiology and Neurobiology, Medical College of Xiamen University, Xiamen<br>wang, xiaochuan; Department of Neurology, the Affiliated Hospital of Hangzhou Normal University<br>lin, Jianzhong; Magnetic Resonance Center, Zhongshan Hospital, Medical College of Xiamen University<br>sun, Yinchuan; Department of Physiology and Neurobiology, Medical College of Xiamen University, Xiamen<br>huang, Yongxia; Department of Physiology and Neurobiology, Medical College of Xiamen University, Xiamen<br>yang, Tianhe; Magnetic Resonance Center, Zhongshan Hospital, Medical College of Xiamen University<br>zheng, Shili; Departments of Respiratory, Zhongshan Hospital, Medical College of Xiamen University<br>fan, ming; Department of Brain Protection and Plasticity, Institute of Basic Medical Sciences<br>Zhang, Jiaying; Department of Physiology and Neurobiology, Medical College of Xiamen University |
| <b>Primary Subject Heading</b>: | Radiology and imaging                                                                                                                                                                                                                                                                                                                                                                                                                                                                                                                                                                                                                                                                                                                                                                                                                                                                                                                                |
| Secondary Subject Heading:      | Neurology, Respiratory medicine                                                                                                                                                                                                                                                                                                                                                                                                                                                                                                                                                                                                                                                                                                                                                                                                                                                                                                                      |
| Keywords:                       | Adult intensive & critical care < INTENSIVE & CRITICAL CARE, Neuroradiology < NEUROLOGY, Magnetic resonance imaging < RADIOLOGY & IMAGING                                                                                                                                                                                                                                                                                                                                                                                                                                                                                                                                                                                                                                                                                                                                                                                                            |
|                                 |                                                                                                                                                                                                                                                                                                                                                                                                                                                                                                                                                                                                                                                                                                                                                                                                                                                                                                                                                      |

SCHOLARONE™  
Manuscripts

# Grey and white matter abnormalities in chronic obstructive pulmonary disease: a case-control study

Haiyan Zhang<sup>1#</sup>, Xiaochuan Wang<sup>2#</sup>, Jianzhong Lin<sup>3</sup>, Yinchuan Sun<sup>1</sup>, Yongxia Huang<sup>1</sup>, Tianhe Yang<sup>3</sup>, Shili Zheng<sup>4</sup>, Ming Fan<sup>5</sup>, Jiaying Zhang<sup>1\*</sup>

1 Department of Physiology and Neurobiology, Medical College of Xiamen University, Xiamen 361005, China;

2 Department of Neurology, the Affiliated Hospital of Hangzhou Normal University, Hangzhou 310015, China;

3 Magnetic Resonance Center, Zhongshan Hospital, Medical College of Xiamen University, Xiamen 361004, China;

4 Departments of Respiratory, Zhongshan Hospital, Medical College of Xiamen University, 361004, Xiamen, China.

5 Department of Brain Protection and Plasticity, Institute of Basic Medical Sciences, Beijing 100850, China

#, authors with equal contributions

## Corresponding author:

Jiaying Zhang, PhD

Department of Physiology and Neurobiology

Medical College of Xiamen University

Xiamen, 361005, China

Tel: +86-0592-2188-421

Email: zhangjiaying@xmu.edu.cn

**Keywords:** Brain, chronic obstructive pulmonary disease, grey matter, magnetic resonance images,

white matter

**Word count:** 2991

**ABSTRACT**

**OBJECTIVES:** The irreversible airflow limitation characterised by chronic obstructive pulmonary disease (COPD) causes a decrease in the oxygen supply to the brain. The present study was to investigate brain structural damage in COPD.

**DESIGN:** Retrospective case-control study. COPD patients and healthy volunteers were recruited. The two groups were matched in age, gender, and educational background.

**SETTING:** A hospital and a number of communities: they are all located in southern Fujian province, China.

**PARTICIPANTS:** 25 stable patients and 25 controls were enrolled from December 2009 to May 2011.

**METHODS:** Using voxel-based morphometry and tract-based spatial statistics based on MRI to analyse grey matter density and white matter fractional anisotropy (FA), respectively, and a battery of neuropsychological tests were performed.

**RESULTS:** COPD patients (vs. controls) showed decreased grey matter density in the limbic and paralimbic structures, including right gyrus rectus, left precentral gyrus, bilateral anterior and middle cingulate gyri, bilateral superior temporal gyri, bilateral anterior insula extending to Rolandic operculum, bilateral thalamus/pulvinars, and left caudate nucleus. COPD patients (vs. controls) had decreased FA values in the bilateral superior corona radiata, bilateral superior and inferior longitudinal fasciculus, bilateral optic radiation, bilateral lingual gyri, left parahippocampal gyrus, and fornix. Lower FA values in these regions were associated with increased radial diffusivity and no changes of longitudinal diffusivity. COPD patients had poor performances in the Mini Mental State Examination, figure memory, and visual reproduction. GM density in some of the above regions in COPD had positive correlations with arterial blood  $Po_2$  while negative correlations with disease duration, and also,

1  
2  
3  
4 had positive correlations with visual tasks.  
5

6 **CONCLUSION:** We demonstrated that COPD exhibited loss of regional grey matter accompanied by  
7  
8 impairment of white matter microstructural integrity, which was associated with disease severity and  
9  
10 may underlie the pathophysiological and psychological changes of COPD.  
11  
12

13  
14  
15  
16 **Funding:** This work was supported by National Science Foundation of China (Project No. 31071041;  
17  
18 81171324), Bureau of Science and Technology of Hangzhou (20090833B10), and Health Bureau of  
19  
20 Zhejiang Province (2009A168).  
21  
22

23  
24 **Competing interests:** None.  
25  
26  
27  
28  
29  
30  
31  
32  
33  
34  
35  
36  
37  
38  
39  
40  
41  
42  
43  
44  
45  
46  
47  
48  
49  
50  
51  
52  
53  
54  
55  
56  
57  
58  
59  
60

## INTRODUCTION

Chronic obstructive pulmonary disease (COPD) continues to be a major cause of morbidity and mortality. It is increasingly recognised that COPD extends beyond the lung.<sup>1</sup> The irreversible airflow limitation characterised by COPD usually develops arterial oxygen desaturation, which could subsequently result in a decrease in oxygen transport to the brain. Hypoxia during COPD has been previously proven to induce cerebral perfusion decline<sup>2</sup> and metabolic changes.<sup>3-6</sup> Moreover, systematic inflammation<sup>1</sup> may also cause neuronal damages in the brain of COPD patients. In COPD patients, clinical symptoms such as neuropsychological deficits,<sup>7</sup> depression and anxiety,<sup>1</sup> and physical disability<sup>1</sup> have been well documented. Taken together, all these data suggest the presence of brain structural alteration. However, until now, it remains largely uninvestigated.

Voxel-based morphometry (VBM) and Tract-Based Spatial Statistics (TBSS)<sup>8</sup> based on magnetic resonance images (MRI) were adopted to measure grey matter (GM) density and white matter (WM) fibrous microstructure properties in tracts, respectively. VBM is an automatic quantitative volumetric technique over the whole brain using voxel by voxel analysis without prior specification of regions of interest for analysis and it does not rely on arbitrarily predefined structures. Recently, the preprocessing steps of VBM have been improved with the Diffeomorphic Anatomical Registration Through Exponentiated Lie algebra (DARTEL) registration method,<sup>9</sup> which can achieve more accurate inter-subject registration of brain images. TBSS is a recently introduced method, which uses diffusion tensor MR imaging (DTI) to measure differences in fractional anisotropy (FA) between groups. TBSS increases the sensitivity and the interpretability of the results compared with voxel-based approaches based purely on non-linear registration.<sup>8</sup> Moreover, diffusion tensor eigenvalues were also included in the analysis since they can help interpret FA changes in WM tracts by providing information regarding

1  
2  
3  
4 likely alterations in the proportion of longitudinally vs. obliquely aligned myelinated fibres. The VBM  
5  
6 and TBSS methods have been extensively applied in clinical researches, including the evaluation of  
7  
8 morphological characteristics of high-altitude residents in our previous study.<sup>10</sup>  
9

10  
11       Dyspnea is the most common complaint and most disabling symptom in patients with COPD.  
12  
13 Functional MRI studies on breathlessness, air hunger, and inspiratory loaded breathing have revealed  
14  
15 that a large number of brain regions, including the frontal cortex, parietal cortex, temporal cortex,  
16  
17 limbic cortex, cerebellar cortex, and brainstem, were activated by dyspnea.<sup>11</sup> These dyspnea-activated  
18  
19 brain regions have been shown to be impaired in congenital central hypoventilation syndrome  
20  
21 patients,<sup>12</sup> in obstructive sleep apnea patients,<sup>13</sup> and in high-altitude residents.<sup>10</sup> We therefore  
22  
23 hypothesised that COPD patients would have similar cerebral impairment.  
24  
25  
26  
27  
28  
29  
30

## 31       **METHODS**

### 32       **Subjects**

33  
34       Twenty-five patients were enrolled from December 2009 to May 2011. All patients had undergone a  
35  
36 period of 30 to 45 days of in-hospital rehabilitation following an acute exacerbation of COPD. At the  
37  
38 time of data collection, patients were in stable condition. Among these patients, 12 discharged patients  
39  
40 were recruited during their rest at home and 13 patients were recruited when they were awaiting  
41  
42 discharge from hospital. Patients were diagnosed in Zhongshan hospital (Xiamen, China) according to  
43  
44 the diagnostic criteria of Global Initiative for Chronic Obstructive Lung Disease (GOLD).<sup>14</sup>  
45  
46  
47  
48       Twenty-five healthy volunteers, with comparable age, gender, and educational background, comprised  
49  
50 the control group. All the subjects were free from a known history of cerebrovascular accident, heart  
51  
52 failure, neurological disorders, OSA, coronary artery disease, diabetes, or other diseases known to  
53  
54  
55  
56  
57  
58  
59  
60

1  
2  
3 affect cognition. Patients were provided with therapy including inhaled ipratropium bromide, bricanyl,  
4  
5  
6 ventoline, and budesonide. Demographic characteristics of the patients and healthy volunteers were  
7  
8  
9 listed in Table 1. Procedures were fully explained and all subjects were provided written informed  
10  
11  
12 consent before participating in the study. The experimental protocol was approved by the Research  
13  
14  
15 Ethics Review Board of Xiamen University.

### 16 17 18 19 **Physiological and neuropsychological tests**

20  
21  
22 Physiological and neuropsychological tests and activities of daily living (ADL) (score range 14-56)<sup>15</sup>  
23  
24 were conducted one day before the MRI scan. Physiological tests include pulse rate and arterial blood  
25  
26 pressure measures, arterial blood gas analysis, and pulmonary function measure. Blood samples were  
27  
28 taken in the morning between 0700-0730 h. The neuropsychological tests include: (i) the Chinese  
29  
30 version of the Mini Mental State Examination (MMSE) measured the general cognitive function. (ii)  
31  
32 the visual reproduction test, figure memory test, and digital span forward and backward tasks, which,  
33  
34 taken from the Chinese revised version of the Wechsler Memory Scale, were used to measure visual  
35  
36 construction ability, visuospatial memory, and short-term working memory, respectively<sup>16</sup>. All data  
37  
38 were analysed using SPSS 19.0 (Chicago, IL, USA). Independent t-test measured between-group  
39  
40 differences. Statistical significance was set at  $p < 0.05$ .  
41  
42  
43  
44  
45  
46  
47  
48

### 49 **MRI data acquisition**

50  
51  
52 Images were acquired on a Siemens Trio Tim 3.0T (Erlangen, Germany) at MRI Research Center  
53  
54 (Zhongshan Hospital, Xiamen, China). A 3D structural MRI was acquired from each subject using a  
55  
56 T1-weighted MPRAGE sequence (TR/TE = 1900 ms/2.48 ms, FOV = 25 × 25 cm<sup>2</sup>, NEX = 1, matrix =  
57  
58  
59  
60

1  
2  
3  
4 512 × 256, slice thickness = 1.0 mm). Conventional 2D T1 and T2 images were also acquired and  
5  
6 examined for any incidental findings. A DTI pulse sequence with single shot diffusion-weighted echo  
7  
8 planar imaging (TR/TE = 3600/95 ms, FOV=24 × 24 cm<sup>2</sup>, NEX = 2, matrix = 128 × 128, slice  
9  
10 thickness = 4.5 mm) was applied sequentially in 30 non-collinear directions (b-value = 1000s/ mm<sup>2</sup>)  
11  
12 with one scan without diffusion weighting (b = 0s/mm<sup>2</sup>). The following data analyses were conducted  
13  
14 by two researchers who were blind to the status of subjects.  
15  
16  
17  
18  
19  
20

### 21 **VBM analysis of 3D T1 images**

22  
23  
24 The 3D T1 images were used for GM analysis using VBM8 toolbox implemented in SPM8 (Wellcome  
25  
26 Department of Imaging Neuroscience, University College London, London, UK). The following  
27  
28 processing steps were carried out: (i) the images were inspected and set at the anterior commissure.  
29  
30 Each reorientated image was segmented into GM, WM and CSF in native space and procrustes aligned  
31  
32 GM images were generated by a rigid transformation. (ii) the DARTEL registration method was used  
33  
34 to create a study-specific template by using the aligned images from all the patients and controls to  
35  
36 improve inter-subject registration of structural images.<sup>9</sup> The procedure implicated in six iterations,  
37  
38 which began with the averaging of aligned data to generate an original template. Then, the first  
39  
40 iteration of the registration was completed on each subject and a new template was created. After this,  
41  
42 the second iteration began. When six iterations were finished, the template was generated, which was  
43  
44 the average of the DARTEL registered data. During iterations, all images were warped to the template  
45  
46 yielding a series of flow fields that parameterised deformations. (iii) the normalised images were  
47  
48 transformed into MNI space. These GM images were then smoothed using a Gaussian kernel of 8 mm  
49  
50 full-width at half-maximum. Independent t-tests were performed to examine between-group differences.  
51  
52  
53  
54  
55  
56  
57  
58  
59  
60



1  
2  
3  
4 The statistical parametric map was generated with the voxel level threshold at  $t > 3.7734$ ,  $p < 0.01$   
5  
6 (FDR correction with gender, age, education, and total intracranial volume as covariates).  
7

8  
9 To analysed the correlation of GM image values with cognitive or physiological measurement, the  
10  
11 following steps were first taken: (1) Regions-of-interests were created for clusters showing differences  
12  
13 between groups; (2) using these Regions-of-interests masks, the GM values were extracted from each  
14  
15 individual's normalised and smoothed GM maps. Then the correlations were analysed using SPSS.  
16  
17 Statistical significance was set at  $p < 0.05$ , with gender, age, and education as covariates.  
18  
19

#### 20 21 22 23 24 **TBSS analysis of DTI**

25  
26 DCM2MII was used to convert diffusion tensor images from the proprietary scanner format to the  
27  
28 NIFTI format. Then the images were processed using the FSL 4.1.5 software package  
29  
30 (<http://www.fmrib.ox.ac.uk/fsl/>). The images were realigned to the b-value (b0) image by affine  
31  
32 transformations using FMRIB's diffusion toolbox (FDT)<sup>17</sup> to minimise distortions and reduce head  
33  
34 motion artifacts. In order to remove non-brain tissue components and background noise, a brain mask  
35  
36 was created from the first b0 image, and then applied in the DTI to extract brain voxels using Brain  
37  
38 Extraction Tool (BET). After these processes, using DTIFit within the FDT, the images were calculated  
39  
40 to get the FA,  $\lambda_1$  (longitudinal diffusivity) (the magnitude of diffusion along the principal diffusion  
41  
42 direction), and  $\lambda_{23}$  (radial diffusivity) (the magnitude of diffusion in the two orthogonal directions  
43  
44 perpendicular to the principal diffusion direction) maps. The whole brain voxel-wise statistic analysis  
45  
46 of the FA images was performed using TBSS in FSL.<sup>7</sup> TBSS processing includes the following steps: (i)  
47  
48 align the FA images of all subjects to a template which was arbitrarily selected from those FA images  
49  
50 by nonlinear registrations; (ii) transform all the aligned FA images into  $1 \times 1 \times 1 \text{ mm}^3$  MNI152 space by  
51  
52  
53  
54  
55  
56  
57  
58  
59  
60

1  
2  
3  
4 affine registrations to remove the effect of cross-subject spatial variability that remains after the  
5  
6 non-linear registration; (iii) create the mean FA image and filter to retain only the centre of the WM  
7  
8 tracts, with the threshold  $FA \geq 0.20$ , and successfully exclude voxels, which consisted of GM or CSF in  
9  
10 the majority of subjects, so as to create the mean FA skeleton.<sup>8</sup> (iv) project individual subjects' FAs  
11  
12 onto mean FA skeleton. (v) following these steps, data was fed into voxel-wise cross-subject statistical  
13  
14 analyses. In all cases, the null distribution was built up over 5000 permutations, with significance  
15  
16 analysed using independent t-tests at  $p < 0.05$  levels, uncorrected for multiple comparisons. We  
17  
18 determined the anatomic localisation of each cluster by means of the FSL atlas tool, which incorporates  
19  
20 several anatomic templates, including the Harvard-Oxford Cortical Structural Atlas, Harvard-Oxford  
21  
22 Subcortical Structural Atlas, Talairach Daemon Labels, and MNI Structural Atlas.  
23  
24  
25  
26  
27

28  
29 Within the cluster of changed FA, mean  $\lambda_1$  and  $\lambda_{23}$  values were extracted from each individual's  $\lambda_1$   
30  
31 and  $\lambda_{23}$  maps. Values were analysed using SPSS. ANOVA statistic was used to identify the group  
32  
33 differences for these distinct brain locations. Statistical significance was set at  $p < 0.05$ .  
34  
35  
36  
37  
38

## 39 RESULTS

### 40 *Physiological and behavioral findings (Table 2)*

41  
42 Compared with the controls, independent t-test showed that COPD patients had significant decreases in  
43  
44 arterial blood  $SaO_2$  and  $PO_2$ , and increases in arterial blood  $Pco_2$  and heart rate. COPD patients had  
45  
46 significantly lower values in one second over forced vital capacity (FVC), forced expiratory volume  
47  
48 (FEV), and FEV1/FVC values and higher respiratory rate. The disease staging categories of COPD  
49  
50 patients based on FEV1% predicted were as follows: FEV1 = 82 % predicted,  $n = 1$ ;  $54.9\% \leq FEV1 <$   
51  
52  $78\%$  ( $64.9 \pm 7.6$ ) predicted,  $n = 8$ ;  $31.9\% \leq FEV1 < 48.4\%$  ( $42.0 \pm 5.4$ ) predicted,  $n = 7$ ;  $FEV1 < 29.9\%$   
53  
54  
55  
56  
57  
58  
59  
60

1  
2  
3  
4 (26.2±2.9) predicted, n = 9. COPD patients had significantly lower scores in ADL, MMSE test, visual  
5  
6 reproduction, and figure memory.  
7  
8

### 9 10 11 **GM density**

12  
13 No subject from either group showed visible abnormalities on T1-weighted structural images. VBM  
14  
15 analysis showed that COPD patients had decreased GM densities compared with healthy controls in the  
16  
17 right gyrus rectus, left precentral gyrus, bilateral anterior and middle cingulate gyri, bilateral superior  
18  
19 temporal gyri, bilateral anterior insula extending to Rolandic operculum (base of the pre- and  
20  
21 temporal gyri, bilateral anterior insula extending to Rolandic operculum (base of the pre- and  
22  
23 post-central gyri), bilateral thalamus/pulvinars, and left caudate nucleus (cluster size > 100 voxels) (Fig.  
24  
25 1-4, Table 3).  
26  
27  
28  
29  
30

### 31 **FA, longitudinal diffusivity, and radial diffusivity in relation to COPD**

32  
33 Whole-brain voxel-wise statistic analysis showed COPD patients had significantly lower FA in a broad  
34  
35 range of brain regions compared with controls (Fig. 5, Table 4). The significantly affected regions  
36  
37 (clusters size > 40 voxels) included the superior corona radiata (corresponding to bilateral precuneus  
38  
39 and bilateral superior parietal lobules), superior longitudinal fasciculus (bilateral supramarginal gyri),  
40  
41 inferior longitudinal fasciculus (left superior temporal gyrus, right middle temporal gyrus, and fusiform  
42  
43 gyrus), bilateral optic radiation, bilateral lingual gyri, left parahippocampal gyrus, and fornix.  
44  
45  
46  
47

48  
49 Lower FA values in these regions were associated with increased radial diffusivity and no changes of  
50  
51 longitudinal diffusivity in COPD patients vs. controls (Table 4).  
52  
53  
54  
55

### 56 **Correlations between MRI measurement and disease severity**

1  
2  
3  
4 The correlations were listed in Table 5. In COPD patients, partial correlation (controlling for disease  
5  
6 duration, FEV1/FVC, age, education, and gender) revealed GM density in the bilateral anterior  
7  
8 cingulate cortex, left superior temporal cortex, bilateral insula/superior temporal/Rolandic Operulum,  
9  
10 bilateral thalamus/Pulvinar, and left caudate nucleus had positive correlations with arterial blood Po<sub>2</sub>.  
11  
12 Partial correlation (controlling for Po<sub>2</sub>, FEV1/FVC, age, education, and gender) revealed GM density in  
13  
14 the bilateral anterior cingulate cortex, right insula/superior temporal/Rolandic Operulum, and right  
15  
16 thalamus/Pulvinar had negative correlations with disease duration. Partial correlation (controlling for  
17  
18 age, education, and gender) analysis showed that the GM density in the left superior temporal lobes and  
19  
20 left insula/superior temporal/Rolandic Operculum in COPD patients was significantly correlated with  
21  
22 figure memory score and the GM density in left precentral gyrus and left thalamus/Pulvinar in COPD  
23  
24 patients correlated significantly with visual reproduction.  
25  
26  
27  
28  
29  
30  
31  
32  
33

## 34 DISCUSSION

35  
36 Our present study revealed that COPD patients had decreased regional GM density confined to the  
37  
38 limbic and paralimbic structures. GM density in impaired regions in COPD patients had significant  
39  
40 positive correlation with arterial blood Po<sub>2</sub> and negative correlation with disease duration. The  
41  
42 decreased WM FA value with increased radial diffusivity value was detected mainly in the visual  
43  
44 cortex of the occipital lobe, the posterior parietal lobe as well as the temporal lobe. Decreased FA was  
45  
46 associated with compromised myelin structure, changes in axonal morphologic structure, and altered  
47  
48 interaxonal spacing of fibre bundles.<sup>18</sup> Radial diffusivity measures motion of water molecules  
49  
50 perpendicular to fibres and an increase of radial diffusivity is interpreted as abnormalities in myelinated  
51  
52 membranes.<sup>19</sup> Consequently, decreased FA and increased radial diffusivity in COPD indicated the  
53  
54  
55  
56  
57  
58  
59  
60

1  
2  
3  
4 impairment of WM microstructural integrity.

5  
6 Previously, Borson et al.<sup>6</sup> only measured the volume of hippocampus in COPD patients using  
7  
8 region-of-interest analysis and did not find significant change. The impaired brain regions in COPD  
9  
10 have also been found in other chronic hypoxic diseases. For example, decrease in GM  
11  
12 volume/concentration in the gyrus rectus, precentral gyrus, anterior cingulate cortex, multiple sites  
13  
14 within the temporal lobes, insular cortex, thalamus, and caudate nucleus were detected in patients with  
15  
16 obstructive sleep apnea.<sup>13</sup> Impairments of WM microstructure in the temporal lobe, parietal lobe, fornix,  
17  
18 and corona radiata were found in patients with congenital central hypoventilation syndrome.<sup>12</sup> In our  
19  
20 previous study, the decrease in GM volume in the anterior insula, anterior cingulate cortex, and  
21  
22 precentral cortex were found in high-altitude residents.<sup>10</sup>  
23  
24  
25  
26  
27

28  
29 GM density in impaired regions in COPD patients had a strongly positive correlation with the  
30  
31 arterial blood Po<sub>2</sub>, which suggested the impairment in GM may result from low blood oxygen.  
32  
33 Moreover, the GM density in some impaired regions showed negative correlations with disease  
34  
35 duration. It is already known that hypoxia can induce metabolic decreases<sup>3-5</sup> and cerebral perfusion  
36  
37 decline<sup>2</sup> in COPD. In addition, COPD patients often suffer from systemic inflammation, which can  
38  
39 exacerbate neuronal injury.<sup>1</sup> A greater proportion of regions showing GM loss located in  
40  
41 limbic/paralimbic cortex in COPD patients may be due to the fact that phylogenetically older regions of  
42  
43 the brain showed sharper vascular responses to hypoxia than evolutionary younger regions.<sup>20</sup>  
44  
45  
46  
47  
48

49 A larger cortical network including the anterior insula and anterior cingulate cortex underlie the  
50  
51 perception of dyspnea<sup>11</sup> and these regions play an important role in regulating the cardiovascular  
52  
53 system.<sup>21</sup> Posterior thalamus was implicated in suppressing the ventilatory response to hypoxia.<sup>22</sup>  
54  
55 Hippocampus has been proved to control arterial pressure and heart rate.<sup>23</sup> Thus the morphological  
56  
57  
58  
59  
60

1  
2  
3  
4 impairments in these regions may play a role in respiratory and cardiovascular disturbances, such as  
5  
6 higher heart rate and higher respiratory rate, in COPD patients tested in our study.  
7

8  
9 In the present study, COPD patients had poorer performance in MMSE, visuospatial memory, and  
10  
11 visual construction task. These results were consistent with those found in previous studies in COPD  
12  
13 patients.<sup>7</sup> In line with the present findings of COPD, we previously found that long-time living in mild  
14  
15 high-altitude hypoxic environment only impaired cognitive performances confined to visual  
16  
17 reproduction and short-time complex figure memory.<sup>24</sup> In our present study, the decreases in GM  
18  
19 density in the frontal precentral cortex, insula/superior temporal cortex/Rolandic Operculum, and  
20  
21 thalamus/pulvinar may be responsible for the performance deficit in visual-related tasks since the GM  
22  
23 density in these areas showed a significant positive correlation with figure memory or visual  
24  
25 reproduction score. The following data support our findings: (i) Recent research has identified the  
26  
27 inferior frontal cortex served as a source of top-down modulation underlying attention to visual  
28  
29 features.<sup>25</sup> (ii) Studies on patients using fMRI and PET demonstrated Rolandic operculum as one of the  
30  
31 visual structures.<sup>26</sup> (iii) The pulvinar region of the thalamus is known to project to posterior parietal  
32  
33 lobe and inferior temporal lobe. The pulvinar has been implicated in various visual functions in lesion  
34  
35 studies.<sup>27</sup> Declines in memory and executive function make contributions to declines in ADL.<sup>28</sup> Visual  
36  
37 construction tasks reflect executive function. Therefore, the decreases in GM density in the above  
38  
39 regions that relate to visual construction may also be responsible for ADL deficits.  
40  
41  
42  
43  
44  
45  
46  
47  
48

49 Our present study found the impairments of WM limited to the pathways of visual processing,  
50  
51 including optic radiation, posterior parietal lobe (superior parietal lobule, supramarginal gyrus, and  
52  
53 precuneus), and the inferior temporal fusiform and lingual gyri. Visual information enters the primary  
54  
55 visual cortex via optic radiation to the visual cortex. Cortical areas along the posterior parietal 'dorsal  
56  
57  
58  
59  
60

1  
2  
3  
4 stream' are primarily concerned with spatial localisation and directing attention, while cortical areas  
5  
6 along the inferior temporal 'ventral stream' are mainly concerned with the recognition and  
7  
8 identification of visual stimuli.<sup>29</sup> COPD also showed impaired WM in the middle temporal gyrus.  
9  
10 Middle temporal cortex is important for the long-term buildup of perceptual memory for ambiguous  
11  
12 motion stimuli.<sup>30</sup> Based on the above data, our findings in WM may also clarify the mechanisms  
13  
14 underlying the deficit in visual-related tasks. In addition, impaired WM in input and output fibres of  
15  
16 hippocampus (fornix) may be related to the deficit in MMSE. Previous study on patients with  
17  
18 Alzheimer's disease found the volumes of hippocampus were significantly reduced and the volumes of  
19  
20 the left hippocampus correlated significantly with the MMSE score.<sup>31</sup> The limitation of our study is the  
21  
22 weak statistical power of FA value analysis, because the results obtained in the TBSS analysis could  
23  
24 not survive multiple comparison correction.  
25  
26  
27  
28  
29  
30  
31  
32  
33

### 34 **Conclusions**

35  
36 In summary, we first demonstrated that COPD extended beyond the lung to the brain, with the decrease  
37  
38 of regional GM density accompanied by impairment in the WM microstructural integrity. Our findings  
39  
40 suggest significant participation of these structures in responding to hypoxic challenges, which include  
41  
42 cardiovascular and air-hunger components. The brain structural changes may also underlie the  
43  
44 psychological and mood changes of COPD.  
45  
46  
47  
48  
49  
50

### 51 **Authors' contributions**

52  
53 *Haiyan Zhang*: contributed to conception and design, the accuracy of the data analysis, drafting the  
54  
55 article, and final approval of the version to be published.  
56  
57  
58  
59  
60

1  
2  
3  
4 *Xiaochuan Wang*: contributed to the study design, revising the article critically for important intellectual  
5  
6 content, and final approval of the version to be published.  
7

8  
9 *Jianzhong Lin*: contributed to acquisition of data, revising the article critically for important intellectual  
10  
11 content, and final approval of the version to be published.  
12

13  
14 *Yingchun Sun*: contributed to acquisition of data, revising the article critically for important intellectual  
15  
16 content, and final approval of the version to be published.  
17

18  
19 *Yongxia Huang*: contributed to acquisition of data, revising the article critically for important intellectual  
20  
21 content, and final approval of the version to be published.  
22

23  
24 *Tianhe Yang*: contributed to acquisition of data, revising the article critically for important intellectual  
25  
26 content, and final approval of the version to be published.  
27

28  
29 *Shili Zheng*: contributed to acquisition of data, revising the article critically for important intellectual  
30  
31 content, and final approval of the version to be published.  
32

33  
34 *Ming Fan*: contributed to acquisition of data, revising the article critically for important intellectual  
35  
36 content, and final approval of the version to be published.  
37

38  
39 *Jiaying Zhang*: contributions to conception and design, acquisition of data, and interpretation of data;  
40  
41 drafting the article and revising it critically for important intellectual content; and final approval of the  
42  
43 version to be published.  
44



**Table 1** Demographic characteristics of the patients with COPD and healthy volunteers

|                                   | COPD patients            | Controls                  | p    |
|-----------------------------------|--------------------------|---------------------------|------|
| Number of subjects                | 25                       | 25                        |      |
| Gender (female) (%)               | 16                       | 16                        |      |
| Age (years) (mean $\pm$ SD)       | 69.2 $\pm$ 8.1 (58 - 84) | 67.96 $\pm$ 8.0 (57 - 86) | 0.59 |
| Education (years) (mean $\pm$ SD) | 6.7 $\pm$ 3.9            | 7.5 $\pm$ 5.0             | 0.53 |
| Family history of COPD (%)        | 4                        | -                         |      |
| Disease duration (years)          | 7.0 $\pm$ 5.7            | -                         |      |
| Actual smokers (%)                | 44                       | 40                        | 0.86 |

**Table 2** Physiological and psychological characteristics

|                                | COPD patients | Controls     | <i>P</i> |
|--------------------------------|---------------|--------------|----------|
| BMI (kg/m <sup>2</sup> )       | 20.8 ± 3.9    | 22.6 ± 2.6   | 0.081    |
| ADL                            | 20.12 ± 6.5   | 14.6 ± 1.52  | <0.001   |
| Heart rate                     | 92.4 ± 16.2   | 70.9 ± 8.94  | <0.001   |
| Blood pressure (mmHg)          |               |              |          |
| systolic pressure              | 136.1 ± 19.1  | 136.5 ± 18.0 | 0.940    |
| diastolic pressure             | 81.8 ± 10.7   | 77.5 ± 14.5  | 0.307    |
| Hematological measurements     |               |              |          |
| Sao <sub>2</sub> (%)           | 94.0 ± 4.2    | 97.0 ± 1.3   | 0.003    |
| Po <sub>2</sub> (mmHg)         | 79.9 ± 23.3   | 98.5 ± 11.3  | 0.006    |
| Pco <sub>2</sub> (mmHg)        | 48.1 ± 6.0    | 39.8 ± 3.0   | <0.001   |
| pH                             | 7.37 ± 0.06   | 7.36 ± 0.01  | 0.731    |
| Pulmonary Function testing     |               |              |          |
| Respiratory rate (breaths/min) | 23.5 ± 6.0    | 16.9 ± 5.5   | 0.003    |
| FVC (% predicted)              | 66.6 ± 17.2   | 96.1 ± 14.7  | <0.001   |
| FEV1 (% predicted)             | 43.4 ± 16.4   | 97.5 ± 16.9  | <0.001   |
| FEV1/ FVC (%)                  | 50.31 ± 10.7  | 80.0 ± 8.32  | <0.001   |
| Cognitive tests                |               |              |          |
| MMSE                           | 23.3 ± 3.4    | 25.8 ± 2.1   | 0.021    |
| Digit Span                     |               |              |          |

|                     |            |            |       |
|---------------------|------------|------------|-------|
| Forward task        | 7.0 ± 1.6  | 7.7 ± 1.4  | 0.125 |
| Backward task       | 4.1 ± 1.9  | 4.3 ± 1.5  | 0.612 |
| Visual reproduction | 8.2 ± 3.4  | 10.3 ± 3.0 | 0.031 |
| Figure memory       | 10.5 ± 3.0 | 12.4 ± 1.9 | 0.010 |

ADL, activities of daily living; BMI, body mass index; FEV1, forced expired volume in one second; FVC, forced vital capacity;

MMSE, Mini Mental State Examination. Data are mean ± SD.

**Table 3** Regional information of decreased grey matter density (cluster size > 100 voxels) in COPD patients compared with healthy controls

| Area                                | Volume<br>(mm <sup>3</sup> ) | Brodmann<br>areas | MNI coordinate |     |     | t-score<br>(peak) |
|-------------------------------------|------------------------------|-------------------|----------------|-----|-----|-------------------|
|                                     |                              |                   | x              | y   | z   |                   |
| Rectus_R                            | 118                          | 11                | 9              | 39  | -20 | 4.31              |
| Precentral_L                        | 100                          | 6                 | -51            | -5  | 33  | 4.95              |
| Cingulum_Ant_R                      | 485                          | 32                | 8              | 38  | 17  | 5.88              |
| Cingulum_Ant_L                      | 212                          | 32                | -8             | 38  | 18  | 4.49              |
| Cingulum_Mid_R                      | 157                          | 24                | 6              | -9  | 42  | 4.87              |
| Cingulum_Mid_L                      | 136                          | 24                | -6             | -9  | 41  | 4.91              |
| Temporal_Sup_L                      | 280                          | 22/42             | -60            | -33 | 3   | 4.99              |
| Temporal_Sup/Rolandic_Oper_L        | 837                          | 22                | -57            | -14 | 10  | 4.91              |
| Insula/Temporal_Sup/Rolandic_Oper_R | 2821                         | 13/22/47          | 44             | 11  | -5  | 5.15              |
| Insula/Temporal_Sup/Rolandic_Oper_L | 1551                         | 13/22/47          | -33            | 12  | -15 | 4.48              |
| Thalamus/Pulvinar_L                 | 1270                         |                   | -12            | -30 | 3   | 6.46              |
| Thalamus/Pulvinar_R                 | 2210                         |                   | 12             | -26 | 8   | 5.29              |

|           |     |    |    |    |      |
|-----------|-----|----|----|----|------|
| Caudate_L | 212 | -9 | 14 | 14 | 4.19 |
|-----------|-----|----|----|----|------|

**Table 4** Main regions showing FA,  $\lambda_1$ ,  $\lambda_2$ ,  $\lambda_3$  values in COPD patients compared with healthy controls

| MNI (peak) |     |     | Voxels             | White matter    | Corresponding cortical area    | FA value     |              | $\lambda_1$ ( $\times 10^3$ mm <sup>2</sup> /s) |               | $\lambda_2$ ( $\times 10^3$ mm <sup>2</sup> /s) |               |
|------------|-----|-----|--------------------|-----------------|--------------------------------|--------------|--------------|-------------------------------------------------|---------------|-------------------------------------------------|---------------|
| x          | y   | z   | (mm <sup>3</sup> ) | tract           |                                | COPD         | Control      | COPD                                            | Control       | COPD                                            | Control       |
| 1          | 10  | 16  | 240                | Fornix          | Fornix                         | 0.248(0.067) | 0.289(0.073) | 2.586(0.314)                                    | 2.406(0.0321) | 1.809(0.295)                                    | 1.577(0.262)* |
| -26        | -69 | 1   | 191                | Lingual gyrus   | Left lingual gyrus             | 0.259(0.042) | 0.283(0.046) | 1.450(0.240)                                    | 1.370(0.224)  | 0.992(0.185)                                    | 0.896(0.168)* |
| 27         | -53 | 3   | 147                | Lingual gyrus   | Right lingual gyrus            | 0.265(0.065) | 0.290(0.056) | 1.381(0.239)                                    | 1.346(0.227)  | 0.955(0.242)                                    | 0.891(0.215)* |
| -23        | -19 | -24 | 77                 | Parahippocampus | Left parahippocampus           | 0.268(0.042) | 0.319(0.046) | 1.234(0.057)                                    | 1.189(0.052)  | 0.869(0.148)                                    | 0.771(0.125)* |
| 38         | -24 | -24 | 77                 | fusiform gyrus  | Right fusiform gyrus           | 0.231(0.037) | 0.248(0.046) | 1.053(0.063)                                    | 1.094(0.073)  | 0.774(0.030)                                    | 0.723(0.032)* |
| -10        | -91 | 17  | 204                | Optic radiation | Left occipital cortex          | 0.234(0.043) | 0.277(0.041) | 1.037(0.038)                                    | 1.020(0.031)  | 0.752(0.063)                                    | 0.693(0.051)* |
| 25         | -86 | -5  | 200                | Optic radiation | Right occipital cortex         | 0.369(0.099) | 0.409(0.122) | 1.171(0.014)                                    | 1.177(0.171)  | 0.649(0.057)                                    | 0.601(0.071)* |
| -9         | -72 | 45  | 94                 | SCR             | Left precuneus                 | 0.283(0.053) | 0.317(0.056) | 1.099(0.032)                                    | 1.069(0.041)  | 0.726(0.075)                                    | 0.665(0.065)* |
| 9          | -66 | 37  | 57                 | SCR             | Right precuneus                | 0.251(0.030) | 0.280(0.044) | 1.044(0.032)                                    | 1.018(0.023)  | 0.868(0.073)                                    | 0.731(0.084)* |
| -15        | -51 | 62  | 57                 | SCR             | Left superior parietal lobule  | 0.267(0.043) | 0.294(0.043) | 1.130(0.051)                                    | 1.082(0.025)  | 0.724(0.039)                                    | 0.671(0.045)* |
| 16         | -45 | 64  | 66                 | SCR             | Right superior parietal lobule | 0.251(0.043) | 0.294(0.051) | 1.176(0.117)                                    | 1.107(0.094)  | 0.805(0.056)                                    | 0.762(0.056)* |

|     |     |     |    |     |                              |              |              |              |              |              |               |
|-----|-----|-----|----|-----|------------------------------|--------------|--------------|--------------|--------------|--------------|---------------|
| -45 | -53 | 31  | 44 | SLF | Left supramarginal gyrus     | 0.221(0.027) | 0.239(0.026) | 1.088(0.020) | 1.076(0.040) | 0.935(0.090) | 0.873(0.071)* |
| 37  | -68 | 21  | 63 | SLF | Right supramarginal gyrus    | 0.220(0.025) | 0.237(0.025) | 1.116(0.039) | 1.090(0.052) | 0.773(0.076) | 0.715(0.007)* |
| -48 | 0   | -16 | 43 | ILF | Left superior temporal gyrus | 0.244(0.013) | 0.270(0.021) | 1.060(0.030) | 0.984(0.015) | 0.758(0.025) | 0.714(0.037)* |
| 53  | -46 | -6  | 41 | ILF | Right middle temporal gyrus  | 0.206(0.016) | 0.241(0.024) | 1.025(0.016) | 1.006(0.021) | 1.605(0.167) | 1.340(0.139)* |

ILF, inferior longitudinal fasciculus; SCR, superior corona radiata; SLF, superior longitudinal fasciculus. Data are presented as means (SD). \*p<0.05.

**Table 5** Correlations of grey matter density in impaired regions with Po<sub>2</sub>, disease duration, and cognitive performances in patients with COPD

| Area                                  | Po <sub>2</sub>  | Disease duration  | Cognitive performances |                     |
|---------------------------------------|------------------|-------------------|------------------------|---------------------|
|                                       | (patients)       | (patients)        | (patients + controls)  |                     |
|                                       |                  |                   | figure memory          | visual reproduction |
| Precentral_L                          |                  |                   |                        | r=0.306, p=0.028    |
| 2Cingulum_Ant_R                       | r=0.530, p=0.021 | r=-0.471, p=0.038 |                        |                     |
| 1Cingulum_Ant_L                       | r=0.744, p=0.001 | r=-0.476, p=0.036 |                        |                     |
| Cingulum_Mid_R                        |                  |                   |                        |                     |
| Cingulum_Mid_L                        |                  |                   |                        |                     |
| 11Temporal_Sup_L                      | r=0.713, p=0.001 |                   | r=0.511, p=0.001       |                     |
| Temporal_Sup/ Rolandic_Oper_L         |                  |                   |                        |                     |
| 6Insula/Temporal_Sup/ Rolandic_Oper_R | r=0.615, p=0.007 |                   |                        |                     |

---

|                                      |                   |                   |                   |
|--------------------------------------|-------------------|-------------------|-------------------|
| 7Insula/Temporal_Sup/Rolandic_Oper_L | r=0.656, p=0.004  |                   | r=0.498, p=0.001  |
| 9Thalamus/Pulvinar_L                 | r=0.487, p =0.033 | r=-0.474, p=0.037 | r=0.284, p =0.044 |
| 8Thalamus/Pulvinar_R                 | r=0.502, p =0.028 | r=-0.517, p=0.024 |                   |
| 5Caudate_L                           | r=0.550, p=0.017  |                   |                   |

---

## REFERENCES

1. Barnes PJ. Chronic obstructive pulmonary disease: effects beyond the lungs. *PLoS Med* 2010; 7:e1000220.
2. Ortapamuk H, Naldoken S. Brain perfusion abnormalities in chronic obstructive pulmonary disease: comparison with cognitive impairment. *Ann Nucl Med* 2006; 20:99-106.
3. Shim TS, Lee JH, Kim SY, *et al.* Cerebral metabolic abnormalities in COPD patients detected by localized proton magnetic resonance spectroscopy. *Chest* 2001; 120:1506-13.
4. Sicard KM, Duong TQ. Effects of hypoxia, hyperoxia, and hypercapnia on baseline and stimulus-evoked BOLD, CBF, and CMRO2 in spontaneously breathing animals. *Neuroimage* 2005; 25:850-8.
5. Sinha S, Kumar V, Jagannathan NR, *et al.* Proton magnetic resonance spectroscopy of brain to study the cerebral metabolic abnormalities in COPD patients: a case control study in north India. *Indian J Chest Dis Allied Sci* 2009; 51:15-9.

- 1  
2  
3  
4 6. Borson S, Scanlan JM, Friedman S, *et al.* Modeling the impact of COPD on the brain.  
5  
6 *International Journal of Chronic Obstructive Pulmonary Disease* 2008; 3: 429-34.  
7
- 8  
9 7. Dodd JW, Getov SV, Jones PW. Cognitive function in COPD. *Eur Respir J* 2010; 35:913-22.  
10
- 11 8. Smith SM, Jenkinson M, Johansen-Berg H, *et al.* Tract-based spatial statistics: voxelwise analysis  
12  
13 of multi-subject diffusion data. *Neuroimage* 2006; 31:1487-505.  
14
- 15 9. Ashburner J. A fast diffeomorphic image registration algorithm. *Neuroimage* 2007; 38:95-113.  
16
- 17 10. Zhang J, Yan X, Shi J, *et al.* Structural modifications of the brain in acclimatization to high-altitude.  
18  
19 *PLoS One* 2010; 5:e11449.  
20
- 21 11. von Leupoldt A, Dahme B. Cortical substrates for the perception of dyspnea. *Chest* 2005;  
22  
23 128:345-54.  
24
- 25 12. Kumar R, Macey PM, Woo MA, *et al.* Diffusion tensor imaging demonstrates brainstem and  
26  
27 cerebellar abnormalities in congenital central hypoventilation syndrome. *Pediatr Res* 2008;  
28  
29 64:275-80.  
30
- 31 13. Joo EY, Tae WS, Lee MJ, *et al.* Reduced brain gray matter concentration in patients with  
32  
33 obstructive sleep apnea syndrome. *Sleep* 2010; 33:235-41.  
34
- 35 14. Pauwels RA, Buist AS, Calverley PM, *et al.* Global strategy for the diagnosis, management, and  
36  
37 prevention of chronic obstructive pulmonary disease. NHLBI/WHO Global Initiative for  
38  
39 Chronic Obstructive Lung Disease (GOLD) Workshop summary. *Am J Respir Crit Care Med*  
40  
41 2001; 163:1256-76.  
42
- 43 15. Lawton MP, Brody EM. Assessment of older people: self-maintaining and instrumental activities  
44  
45 of daily living. *Gerontologist* 1969; 9:179-86.  
46
- 47 16. Gong YX. Manual for the Wechsler Memory Scale-Revised. Hunan Medical University. Changsha,  
48  
49  
50  
51  
52  
53  
54  
55  
56  
57  
58  
59  
60

- 1  
2  
3 Hunan, China. 1989.  
4  
5  
6 17. Jenkinson M, Smith S. A global optimisation method for robust affine registration of brain images.  
7  
8 *Med Image Anal* 2001; 5:143-56.  
9  
10  
11 18. Beaulieu C. The basis of anisotropic water diffusion in the nervous system - a technical review.  
12  
13 *NMR Biomed* 2002; 15:435-55.  
14  
15  
16 19. Song SK, Sun SW, Ramsbottom MJ, *et al.* Demyelination revealed through MRI as increased  
17  
18 radial (but unchanged axial) diffusion of water. *Neuroimage* 2002; 17:1429-36.  
19  
20  
21 20. Binks AP, Cunningham VJ, Adams L, *et al.* Gray matter blood flow change is unevenly distributed  
22  
23 during moderate isocapnic hypoxia in humans. *J Appl Physiol* 2008; 104:212-7.  
24  
25  
26 21. Nagai M, Hoshida S, Kario K. The insular cortex and cardiovascular system: a new insight into the  
27  
28 brain-heart axis. *J Am Soc Hypertens* 2010; 4:174-82.  
29  
30  
31 22. Teppema LJ, Dahan A. The ventilatory response to hypoxia in mammals: mechanisms,  
32  
33 measurement, and analysis. *Physiol Rev* 2010; 90:675-754.  
34  
35  
36 23. Macefield VG, Gandevia SC, Henderson LA. Neural sites involved in the sustained increase in  
37  
38 muscle sympathetic nerve activity induced by inspiratory capacity apnea: a fMRI study. *J Appl*  
39  
40 *Physiol* 2006; 100:266-73.  
41  
42  
43 24. Zhang J, Liu H, Yan X, *et al.* Minimal effects on human memory following long-term living at  
44  
45 moderate altitude. *High Alt Med Biol* 2011; 12:37-43.  
46  
47  
48 25. Zanto TP, Rubens MT, Bollinger J, *et al.* Top-down modulation of visual feature processing: the  
49  
50 role of the inferior frontal junction. *Neuroimage* 2010; 53:736-45.  
51  
52  
53 26. Fried I, Nenov VI, Ojemann SG, *et al.* Functional MR and PET imaging of rolandic and visual  
54  
55 cortices for neurosurgical planning. *J Neurosurg* 1995; 83:854-61.  
56  
57  
58  
59  
60



- 1  
2  
3  
4 27. Arend I, Machado L, Ward R, *et al*. The role of the human pulvinar in visual attention and action:  
5  
6 evidence from temporal-order judgment, saccade decision, and antisaccade tasks. *Prog Brain*  
7  
8 *Res* 2008; 171:475-83.  
9
- 10  
11 28. Tomaszewski Farias S, Cahn-Weiner DA, Harvey DJ, *et al*. Longitudinal changes in memory and  
12  
13 executive functioning are associated with longitudinal change in instrumental activities of  
14  
15 daily living in older adults. *Clin Neuropsychol* 2009; 23:446-61.  
16  
17
- 18  
19 29. Itti L, Koch C. Computational modelling of visual attention. *Nat Rev Neurosci* 2001; 2:194-203  
20
- 21  
22 30. Brascamp JW, Kanai R, Walsh V, *et al*. Human middle temporal cortex, perceptual bias, and  
23  
24 perceptual memory for ambiguous three-dimensional motion. *J Neurosci* 2010; 30:760-6.  
25
- 26  
27 31. Laakso MP, Soininen H, Partanen K, *et al*. Volumes of hippocampus, amygdala and frontal lobes  
28  
29 in the MRI-based diagnosis of early Alzheimer's disease: correlation with memory functions. *J*  
30  
31 *Neural Transm Park Dis Dement Sect* 1995; 9:73-86.  
32  
33  
34  
35  
36  
37  
38  
39  
40  
41  
42  
43  
44  
45  
46  
47  
48  
49  
50  
51  
52  
53  
54  
55  
56  
57  
58  
59  
60

1  
2  
3  
4  
5  
6  
7  
8  
9  
10  
11  
12  
13  
14  
15  
16  
17  
18  
19  
20  
21  
22  
23  
24  
25  
26  
27  
28  
29  
30  
31  
32  
33  
34  
35  
36  
37  
38  
39  
40  
41  
42  
43  
44  
45  
46  
47  
48  
49  
50  
51  
52  
53  
54  
55  
56  
57  
58  
59  
60

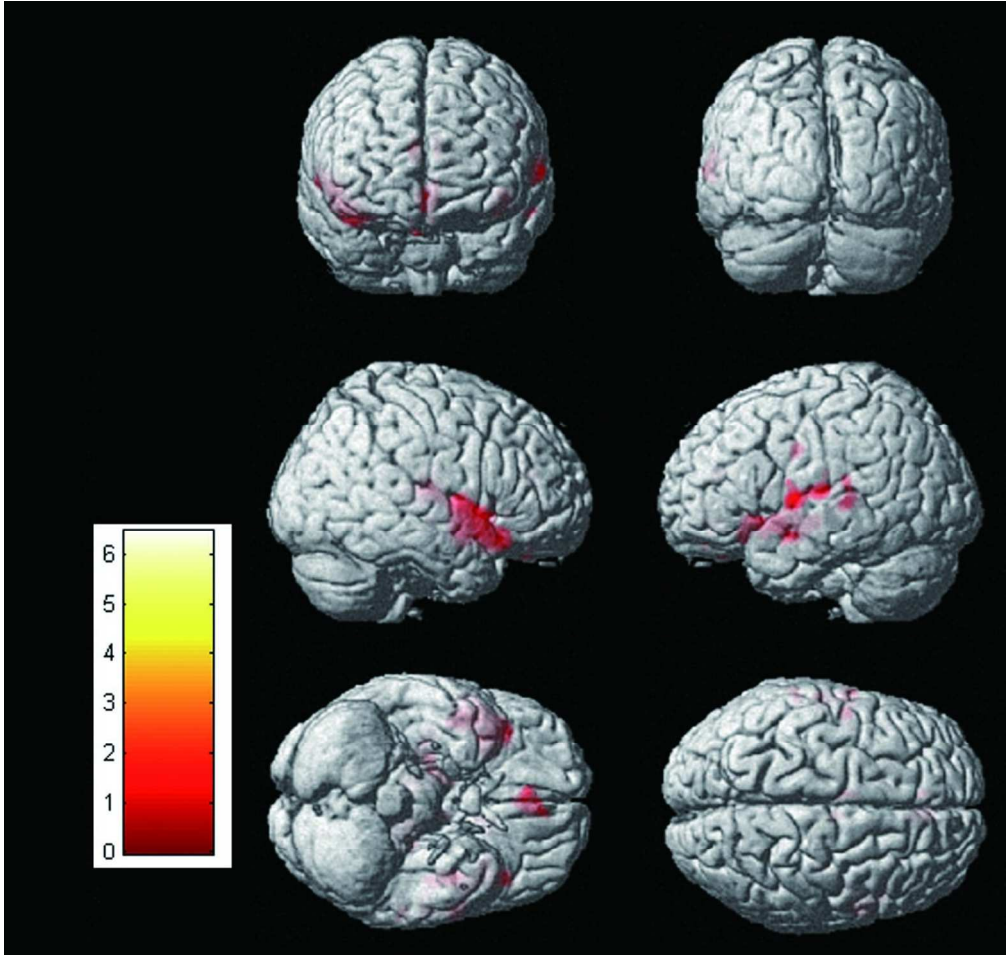

Figure 1 A statistical parametric map for grey matter density reduced in COPD patients vs. healthy controls (pFDR<sub>corrected</sub> < 0.01) overlaid on the MNI template.



Figure 2 Grey matter density decrease in COPD patients vs. healthy controls. Three-dimensional slices depicting regions showing reduced grey matter in the right gyrus rectus, left precentral gyrus, left Rolandic operculum and superior temporal gyrus overlaid on a T1-weighted MRI anatomical image in the MNI template.

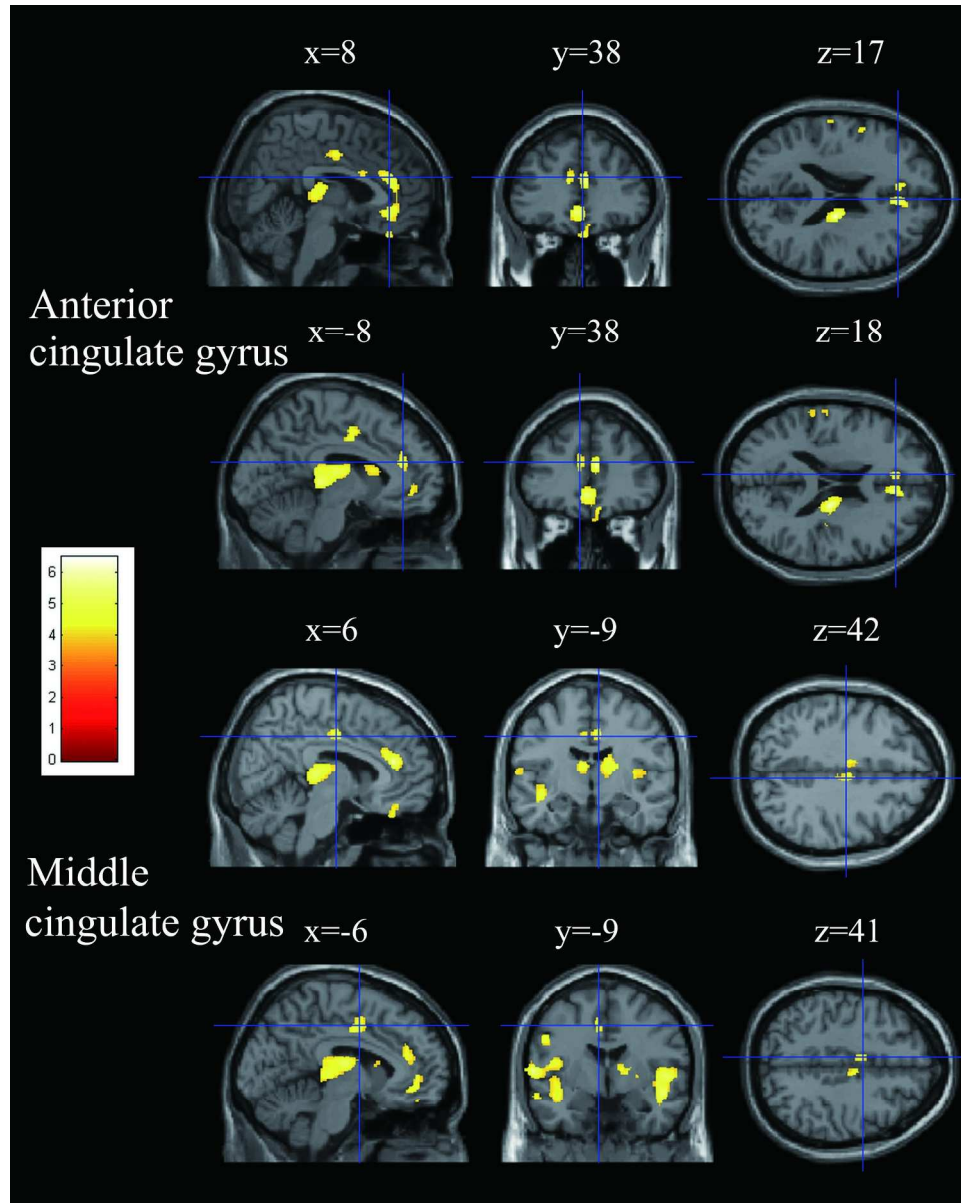

46  
47  
48  
49  
50  
51  
52  
53  
54  
55  
56  
57  
58  
59  
60

Figure 3 Grey matter density decrease in COPD patients vs. healthy controls. Three-dimensional slices depicting regions showing reduced grey matter in the bilateral anterior and middle cingulate gyri overlaid on a T1-weighted MRI anatomical image in the MNI template.





46  
47  
48  
49  
50  
51  
52  
53  
54  
55  
56  
57  
58  
59  
60

Figure 4 Grey matter density decrease in COPD patients vs. healthy controls. Three-dimensional slices depicting regions showing reduced grey matter in the bilateral insula, bilateral thalamus, and left caudate nucleus overlaid on a T1-weighted MRI anatomical image in the MNI template.

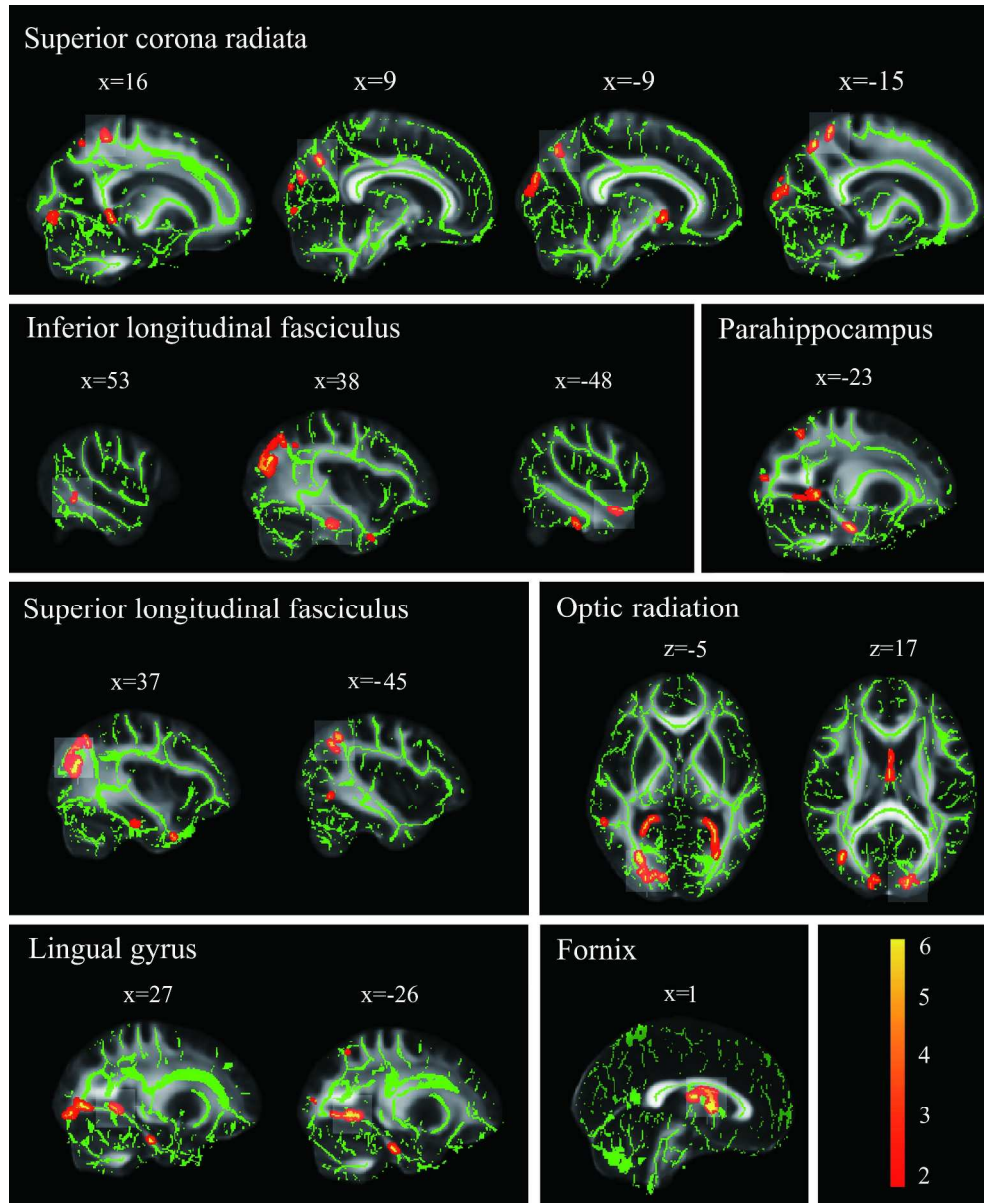

Figure 5 Statistical maps of group comparison of FA value on a voxel-wise basis (results of TBSS). The group's mean FA skeleton (green) was overlaid on the MNI template. The threshold of mean FA skeleton was set at 0.2. COPD patients show significantly lower FA value than healthy controls ( $p < 0.05$ ).

STROBE 2007 (v4) Statement—Checklist of items that should be included in reports of *case-control studies*

| Section/Topic                | Item # | Recommendation                                                                                                                                                                       | Reported on page # |
|------------------------------|--------|--------------------------------------------------------------------------------------------------------------------------------------------------------------------------------------|--------------------|
| Title and abstract           | 1      | (a) Indicate the study's design with a commonly used term in the title or the abstract                                                                                               | 1                  |
|                              |        | (b) Provide in the abstract an informative and balanced summary of what was done and what was found                                                                                  | 2                  |
| <b>Introduction</b>          |        |                                                                                                                                                                                      |                    |
| Background/rationale         | 2      | Explain the scientific background and rationale for the investigation being reported                                                                                                 | 4                  |
| Objectives                   | 3      | State specific objectives, including any prespecified hypotheses                                                                                                                     | 4 and 5            |
| <b>Methods</b>               |        |                                                                                                                                                                                      |                    |
| Study design                 | 4      | Present key elements of study design early in the paper                                                                                                                              | 5                  |
| Setting                      | 5      | Describe the setting, locations, and relevant dates, including periods of recruitment, exposure, follow-up, and data collection                                                      | 5                  |
| Participants                 | 6      | (a) Give the eligibility criteria, and the sources and methods of case ascertainment and control selection. Give the rationale for the choice of cases and controls                  | 5 and 6            |
|                              |        | (b) For matched studies, give matching criteria and the number of controls per case                                                                                                  | 5                  |
| Variables                    | 7      | Clearly define all outcomes, exposures, predictors, potential confounders, and effect modifiers. Give diagnostic criteria, if applicable                                             | 5                  |
| Data sources/<br>measurement | 8*     | For each variable of interest, give sources of data and details of methods of assessment (measurement). Describe comparability of assessment methods if there is more than one group | 6                  |
| Bias                         | 9      | Describe any efforts to address potential sources of bias                                                                                                                            |                    |
| Study size                   | 10     | Explain how the study size was arrived at                                                                                                                                            |                    |
| Quantitative variables       | 11     | Explain how quantitative variables were handled in the analyses. If applicable, describe which groupings were chosen and why                                                         |                    |
| Statistical methods          | 12     | (a) Describe all statistical methods, including those used to control for confounding                                                                                                | 6 - 8              |
|                              |        | (b) Describe any methods used to examine subgroups and interactions                                                                                                                  | 6 - 8              |
|                              |        | (c) Explain how missing data were addressed                                                                                                                                          |                    |
|                              |        | (d) If applicable, explain how matching of cases and controls was addressed                                                                                                          |                    |
|                              |        | (e) Describe any sensitivity analyses                                                                                                                                                | 6 - 8              |
| <b>Results</b>               |        |                                                                                                                                                                                      |                    |

|                          |     |                                                                                                                                                                                                                                                                                                                                                                                                               |          |
|--------------------------|-----|---------------------------------------------------------------------------------------------------------------------------------------------------------------------------------------------------------------------------------------------------------------------------------------------------------------------------------------------------------------------------------------------------------------|----------|
| Participants             | 13* | (a) Report numbers of individuals at each stage of study—eg numbers potentially eligible, examined for eligibility, confirmed eligible, included in the study, completing follow-up, and analysed<br>(b) Give reasons for non-participation at each stage<br>(c) Consider use of a flow diagram                                                                                                               | 5        |
| Descriptive data         | 14* | (a) Give characteristics of study participants (eg demographic, clinical, social) and information on exposures and potential confounders<br>(b) Indicate number of participants with missing data for each variable of interest                                                                                                                                                                               | 17       |
| Outcome data             | 15* | Report numbers in each exposure category, or summary measures of exposure                                                                                                                                                                                                                                                                                                                                     |          |
| Main results             | 16  | (a) Give unadjusted estimates and, if applicable, confounder-adjusted estimates and their precision (eg, 95% confidence interval). Make clear which confounders were adjusted for and why they were included<br>(b) Report category boundaries when continuous variables were categorized<br>(c) If relevant, consider translating estimates of relative risk into absolute risk for a meaningful time period | 9 and 10 |
| Other analyses           | 17  | Report other analyses done—eg analyses of subgroups and interactions, and sensitivity analyses                                                                                                                                                                                                                                                                                                                |          |
| <b>Discussion</b>        |     |                                                                                                                                                                                                                                                                                                                                                                                                               |          |
| Key results              | 18  | Summarise key results with reference to study objectives                                                                                                                                                                                                                                                                                                                                                      | 11       |
| Limitations              | 19  | Discuss limitations of the study, taking into account sources of potential bias or imprecision. Discuss both direction and magnitude of any potential bias                                                                                                                                                                                                                                                    |          |
| Interpretation           | 20  | Give a cautious overall interpretation of results considering objectives, limitations, multiplicity of analyses, results from similar studies, and other relevant evidence                                                                                                                                                                                                                                    | 11-15    |
| Generalisability         | 21  | Discuss the generalisability (external validity) of the study results                                                                                                                                                                                                                                                                                                                                         |          |
| <b>Other information</b> |     |                                                                                                                                                                                                                                                                                                                                                                                                               |          |
| Funding                  | 22  | Give the source of funding and the role of the funders for the present study and, if applicable, for the original study on which the present article is based                                                                                                                                                                                                                                                 | 3        |

\*Give information separately for cases and controls in case-control studies and, if applicable, for exposed and unexposed groups in cohort and cross-sectional studies.

**Note:** An Explanation and Elaboration article discusses each checklist item and gives methodological background and published examples of transparent reporting. The STROBE checklist is best used in conjunction with this article (freely available on the Web sites of PLoS Medicine at <http://www.plosmedicine.org/>, Annals of Internal Medicine at <http://www.annals.org/>, and Epidemiology at <http://www.epidem.com/>). Information on the STROBE Initiative is available at [www.strobe-statement.org](http://www.strobe-statement.org).
